# Supplementary material for: Global Expression of Molecular Transporters in the Human Vaginal Tract: Implications for HIV Chemoprophylaxis
Source: PLoS One. 2013 Oct 15;8(10):e77340. doi: 10.1371/journal.pone.0077340 (PMC3797116; doi:10.1371/journal.pone.0077340)
Supplement: Dataset S1 — Microarray membrane transporter gene expression dataset. (XLS) [file pone.0077340.s002.xls]

## Sheet: mito_patient
Probe	Gene	6.AVG	4.AVG	1.AVG	3.AVG	2.AVG	5.AVG	Pos.Count
A_24_P69439	SLC25A32	8.12246	8.82756	9.47828	8.36784	8.68652	9.1136	6
A_23_P38497	SLC25A11	10.3165	10.2252	9.87577	10.3239	10.2334	10.3888	6
A_33_P3227904	SLC25A34	6.07987	6.78277	6.44211	6.23208	6.67824	6.67067	6
A_23_P142714	SLC25A12	8.78064	8.84898	8.52571	8.87827	8.6886	8.94823	6
A_23_P91814	SLC25A38	6.25358	6.26038	6.16654	6.3824	6.0487	6.60945	6
A_24_P368544	SLC25A26	4.45857	4.21853	3.92658	4.36573	3.64603	4.1553	6
A_33_P3292179	ABCA9	11.1669	11.1536	11.0527	11.1723	11.6974	11.8161	6
A_33_P3380417	SLC25A30	6.50944	6.10696	6.08995	6.17618	6.68168	6.44507	6
A_23_P137057	SLC25A5	13.8607	13.7183	13.7173	13.8501	13.4961	13.913	6
A_23_P72025	SLC25A20	6.94554	6.51276	6.79047	6.89859	7.01208	6.34291	6
A_23_P125668	SLC25A43	9.79514	9.36835	9.11872	9.47544	9.3107	9.3632	6
A_21_P0012276	SLC25A15	4.71608	4.60891	4.71007	4.49896	4.15519	4.38898	6
A_33_P3350074	SLC25A19	9.7795	9.42705	9.84259	9.08957	9.44434	9.53423	6
A_32_P224522	SLC25A23	10.4012	10.8698	10.9816	10.7607	10.1397	10.4619	6
A_33_P3374623	ABCA7	7.73096	7.96544	7.61919	8.81472	8.5686	9.08856	6
A_23_P100764	SLC25A39	12.4115	12.0018	11.8098	12.0301	11.9673	11.9893	6
A_23_P47704	UCP2	6.27344	7.72108	7.48379	7.68502	8.0651	7.56264	6
A_23_P77048	SLC25A29	9.86938	9.82043	10.3926	10.0525	9.89187	10.5354	6
A_24_P292470	UCP3	10.9889	11.2652	11.1153	11.016	11.4352	10.622	6
A_23_P135966	SLC25A14	9.19048	9.14917	9.2836	9.13795	9.04042	9.22564	6
A_33_P3343210	SLC25A37	7.642	6.99495	6.68044	7.31734	7.87547	7.6742	6
A_23_P409386	SLC25A22	8.46409	8.67027	8.62082	8.48395	8.39164	8.66274	6
A_24_P934563	MTCH2	8.30495	8.17605	7.88049	8.2076	7.79618	8.09853	6
A_23_P145388	MTCH1	14.4342	14.2333	14.3904	14.3288	14.7942	14.5361	6
A_23_P82334	SLC25A13	7.70365	7.40958	7.44638	7.42627	7.39166	7.27452	6
A_33_P3379157	MTCH1	11.1847	10.8603	11.0125	11.2116	11.2434	11.283	6
A_33_P3411397	SLC25A6	13.5766	13.9129	13.8953	13.9533	13.8991	14.1512	6
A_23_P422511	SLC25A45	5.19682	5.14726	5.00831	5.21431	5.29841	4.62352	6
A_33_P3589217	SLC25A6	12.1884	12.5437	12.2263	12.8209	12.5108	12.9527	6
A_33_P3347392	SLC25A46	6.97197	6.93515	6.74703	6.7716	6.7755	6.57045	6
A_23_P74799	SLC25A24	8.24221	8.75709	8.63128	8.57006	8.54776	8.94439	6
A_23_P313550	SLC25A41	4.89438	5.86156	4.08656	5.27891	4.78079	6.17053	6
A_23_P57547	SLC25A17	8.72145	8.64906	8.6444	8.57639	8.38451	8.72027	6
A_24_P355267	SLC25A25	9.97832	11.2953	11.1292	11.6065	9.74027	11.7052	6
A_24_P400473	SLC25A44	9.52585	9.67769	9.63617	9.66522	9.74804	10.4861	6
A_24_P206047	SLC25A4	9.96957	9.93239	10.2484	10.2972	9.7052	10.2724	6
A_33_P3228762	SLC25A36	9.36767	9.44775	9.21657	9.58861	9.7832	9.6468	6
A_33_P3387901	SLC25A19	5.68237	5.22281	5.41922	5.22587	5.03404	5.33665	6
A_33_P3275959	SLC25A16	6.86238	7.18673	6.68613	7.50563	7.56531	7.87842	6
A_33_P3840512	SLC25A15	5.57968	5.40283	5.5206	5.10712	5.37228	5.32845	6
A_23_P133375	SLC25A46	8.2513	8.09414	7.91816	8.08153	7.98465	7.93664	6
A_23_P408455	SLC25A36	7.53967	7.56417	7.33884	7.61888	7.8731	7.7492	6
A_23_P25204	SLC25A3	14.8165	14.7857	14.7747	14.5765	14.5958	14.9632	6
A_23_P75220	SLC25A28	9.38322	9.57343	9.51225	9.49164	9.33954	10.0815	6
A_23_P500400	ABCA6	3.98028	4.54907	4.88256	3.90741	5.17839	5.25002	6
A_33_P3267948	SLC25A23	6.36409	6.31622	6.55365	6.47369	5.67362	6.186	6
A_23_P36226	SLC25A33	8.68586	9.92869	9.68856	9.48193	8.60946	9.67026	6
A_23_P436526	SLC25A42	6.37537	6.13061	5.9304	6.81474	7.01424	6.96722	6
A_23_P146830	SLC25A10	8.73583	8.42263	8.45189	8.59762	7.71121	8.5725	6
A_23_P120776	SLC25A1	10.741	10.5981	10.5734	10.6632	10.4237	10.6289	6
A_23_P423891	SLC25A16	7.48178	7.49646	7.47339	7.35497	7.17439	7.02547	6
A_23_P432626	SLC25A40	4.37337	4.56421	4.38923	4.80371	4.37552	4.57456	6
A_23_P106258	SLC25A47	4.04633	3.8602	4.63857	3.96404	3.67836	3.81591	6
A_23_P136504	SLC25A21	3.90561	4.43045	4.27623	4.43703	2.89492	4.44182	5
A_23_P64070	SLC25A45	3.71983	3.42954	3.68558	3.63547	3.31353	3.6873	4
A_33_P3412468	SLC25A27	3.19973	3.18884	3.46442	4.63324	5.1655	4.5832	3
A_23_P424051	SLC25A48	2.72126	3.53283	2.65294	2.90813	2.58472	2.12513	1
A_33_P3357853	SLC25A48	2.10013	2.12288	2.63596	2.12974	2.11867	2.12591	0
A_23_P160940	ABCA4	2.35591	2.57185	2.00313	2.62436	2.6779	2.76387	0
A_23_P366726	SLC25A35	2.72311	2.89226	2.99077	3.46819	2.42357	2.89818	0
A_21_P0000084	SLC25A21	2.34682	2.19975	2.39549	2.11021	1.91674	2.03512	0
A_23_P30091	UCP1	2.23788	2.23118	2.26866	2.21557	2.21341	2.23957	0
A_24_P74508	SLC25A18	2.08005	2.07112	2.07757	2.06122	2.07806	2.07198	0
A_23_P18755	SLC25A31	2.18441	2.18161	2.19417	2.15164	2.1757	2.16609	0
A_24_P246841	SLC25A27	1.9914	2.11022	2.61781	2.22339	3.01065	2.09355	0
A_23_P92650	SLC25A2	2.66749	3.06628	3.01852	3.002	2.53998	2.83788	0

## Sheet: mito_count
Probe	Gene	Pos.Count	Pos.Percent
A_24_P69439	SLC25A32	44	100
A_23_P38497	SLC25A11	44	100
A_33_P3227904	SLC25A34	44	100
A_23_P142714	SLC25A12	44	100
A_23_P91814	SLC25A38	44	100
A_33_P3292179	ABCA9	44	100
A_33_P3380417	SLC25A30	44	100
A_23_P137057	SLC25A5	44	100
A_23_P72025	SLC25A20	44	100
A_23_P125668	SLC25A43	44	100
A_21_P0012276	SLC25A15	44	100
A_33_P3350074	SLC25A19	44	100
A_32_P224522	SLC25A23	44	100
A_33_P3374623	ABCA7	44	100
A_23_P100764	SLC25A39	44	100
A_23_P47704	UCP2	44	100
A_23_P77048	SLC25A29	44	100
A_24_P292470	UCP3	44	100
A_23_P135966	SLC25A14	44	100
A_33_P3343210	SLC25A37	44	100
A_23_P409386	SLC25A22	44	100
A_24_P934563	MTCH2	44	100
A_23_P145388	MTCH1	44	100
A_23_P82334	SLC25A13	44	100
A_33_P3379157	MTCH1	44	100
A_33_P3411397	SLC25A6	44	100
A_23_P422511	SLC25A45	44	100
A_33_P3589217	SLC25A6	44	100
A_33_P3347392	SLC25A46	44	100
A_23_P74799	SLC25A24	44	100
A_23_P313550	SLC25A41	44	100
A_23_P57547	SLC25A17	44	100
A_24_P355267	SLC25A25	44	100
A_24_P400473	SLC25A44	44	100
A_24_P206047	SLC25A4	44	100
A_33_P3228762	SLC25A36	44	100
A_33_P3387901	SLC25A19	44	100
A_33_P3275959	SLC25A16	44	100
A_33_P3840512	SLC25A15	44	100
A_23_P133375	SLC25A46	44	100
A_23_P408455	SLC25A36	44	100
A_23_P25204	SLC25A3	44	100
A_23_P75220	SLC25A28	44	100
A_33_P3267948	SLC25A23	44	100
A_23_P36226	SLC25A33	44	100
A_23_P436526	SLC25A42	44	100
A_23_P146830	SLC25A10	44	100
A_23_P120776	SLC25A1	44	100
A_23_P423891	SLC25A16	44	100
A_23_P432626	SLC25A40	42	95.4545
A_24_P368544	SLC25A26	40	90.9091
A_23_P136504	SLC25A21	37	84.0909
A_23_P500400	ABCA6	37	84.0909
A_23_P106258	SLC25A47	36	81.8182
A_33_P3412468	SLC25A27	32	72.7273
A_23_P64070	SLC25A45	26	59.0909
A_23_P366726	SLC25A35	12	27.2727
A_23_P424051	SLC25A48	9	20.4545
A_23_P92650	SLC25A2	7	15.9091
A_23_P160940	ABCA4	2	4.54545
A_24_P246841	SLC25A27	2	4.54545
A_33_P3357853	SLC25A48	1	2.27273
A_21_P0000084	SLC25A21	1	2.27273
A_23_P30091	UCP1	0	0
A_24_P74508	SLC25A18	0	0
A_23_P18755	SLC25A31	0	0

## Sheet: mito_avg
Probe	Gene	Avg.Intensity
A_23_P25204	SLC25A3	14.7549
A_23_P145388	MTCH1	14.4153
A_33_P3411397	SLC25A6	13.8735
A_23_P137057	SLC25A5	13.8025
A_33_P3589217	SLC25A6	12.5437
A_23_P100764	SLC25A39	12.0808
A_33_P3292179	ABCA9	11.2903
A_33_P3379157	MTCH1	11.1433
A_24_P292470	UCP3	11.0227
A_24_P355267	SLC25A25	10.9804
A_23_P120776	SLC25A1	10.6397
A_32_P224522	SLC25A23	10.6259
A_23_P38497	SLC25A11	10.2516
A_24_P206047	SLC25A4	10.1146
A_23_P77048	SLC25A29	10.0873
A_24_P400473	SLC25A44	9.76435
A_23_P75220	SLC25A28	9.56197
A_33_P3350074	SLC25A19	9.50569
A_33_P3228762	SLC25A36	9.48596
A_23_P125668	SLC25A43	9.46303
A_23_P36226	SLC25A33	9.34248
A_23_P135966	SLC25A14	9.17977
A_23_P142714	SLC25A12	8.79999
A_24_P69439	SLC25A32	8.66098
A_23_P57547	SLC25A17	8.64165
A_23_P74799	SLC25A24	8.57998
A_23_P409386	SLC25A22	8.54521
A_23_P146830	SLC25A10	8.524
A_33_P3374623	ABCA7	8.29173
A_24_P934563	MTCH2	8.13763
A_23_P133375	SLC25A46	8.07376
A_23_P408455	SLC25A36	7.59149
A_23_P82334	SLC25A13	7.46958
A_33_P3343210	SLC25A37	7.36252
A_23_P423891	SLC25A16	7.35738
A_23_P47704	UCP2	7.31605
A_33_P3275959	SLC25A16	7.25296
A_33_P3347392	SLC25A46	6.80891
A_23_P72025	SLC25A20	6.7623
A_23_P436526	SLC25A42	6.52887
A_33_P3227904	SLC25A34	6.39796
A_33_P3267948	SLC25A23	6.3354
A_23_P91814	SLC25A38	6.31749
A_33_P3380417	SLC25A30	6.31554
A_33_P3840512	SLC25A15	5.37526
A_33_P3387901	SLC25A19	5.37049
A_23_P313550	SLC25A41	5.20752
A_23_P422511	SLC25A45	5.08445
A_21_P0012276	SLC25A15	4.55609
A_23_P432626	SLC25A40	4.5413
A_23_P500400	ABCA6	4.44636
A_24_P368544	SLC25A26	4.22644
A_23_P136504	SLC25A21	4.17697
A_23_P106258	SLC25A47	4.01939
A_33_P3412468	SLC25A27	3.94685
A_23_P64070	SLC25A45	3.62161
A_23_P366726	SLC25A35	2.97637
A_23_P92650	SLC25A2	2.87178
A_23_P424051	SLC25A48	2.76518
A_23_P160940	ABCA4	2.49122
A_24_P246841	SLC25A27	2.23677
A_23_P30091	UCP1	2.23419
A_21_P0000084	SLC25A21	2.19534
A_33_P3357853	SLC25A48	2.18907
A_23_P18755	SLC25A31	2.17366
A_24_P74508	SLC25A18	2.07237

## Sheet: plasma_patient
Probe	Gene	6.AVG	4.AVG	1.AVG	3.AVG	2.AVG	5.AVG	Pos.Count
A_23_P215175	ABCF2	9.6026	9.75261	9.62733	9.32852	9.52678	9.71118	6
A_23_P11032	SLC9A7	7.69168	7.33705	7.34445	7.25241	6.97067	7.31189	6
A_33_P3384108	SLC19A1	6.22473	5.49336	4.96289	5.80725	5.3828	5.65197	6
A_23_P93217	SLC22A7	6.95032	6.31412	6.23712	5.93104	5.02234	7.15265	6
A_23_P31996	SLC46A2	5.95803	5.09494	4.34267	4.79415	5.9454	3.50005	6
A_33_P3224819	SLC45A4	5.97313	6.54171	6.86807	6.24103	6.46422	6.9197	6
A_23_P216630	SLC44A1	12.2811	12.6605	12.1662	12.466	12.5817	12.4642	6
A_32_P147078	SLC8A1	5.42003	4.99631	5.41872	5.15624	5.60163	4.88532	6
A_23_P152995	SLC6A4	8.06555	8.18969	7.11733	6.96584	6.75651	7.37679	6
A_33_P3316539	SLC7A2	8.26704	7.05329	6.9096	7.64987	7.75785	6.6865	6
A_33_P3298861	SLC12A8	5.87407	5.37681	5.38907	5.43569	5.11483	5.31811	6
A_23_P119778	SLC39A10	3.57978	4.68609	4.1305	4.19515	4.15913	4.17733	6
A_33_P3240353	SLC39A4	10.0752	11.1609	10.6265	11.4122	11.0253	10.8879	6
A_33_P3337026	SLC6A8	7.9232	7.70328	7.67427	8.04193	7.66173	7.84689	6
A_23_P115726	SLC16A9	9.19969	8.79553	7.8488	9.05889	7.59973	7.88272	6
A_24_P381494	SLC11A2	8.40231	8.04696	8.5252	8.03403	7.97112	7.12862	6
A_33_P3214650	TAP2	9.55753	9.37392	9.47918	9.53842	9.17228	9.62652	6
A_24_P156049	SLC39A6	5.74484	6.35406	6.30885	6.1744	6.41764	5.98294	6
A_23_P159937	SLC6A8	7.69061	7.81492	7.80871	8.09717	7.84072	8.06881	6
A_33_P3333050	SLC9A4	8.2841	7.64864	7.92982	7.92296	7.2566	7.39451	6
A_33_P3229181	SLC12A9	10.3446	10.3052	10.3724	10.5084	10.5746	10.6117	6
A_23_P102391	SLC40A1	7.88602	8.47767	8.0137	8.36957	8.96442	9.05509	6
A_19_P00805942	SLC7A14	3.96081	4.35213	4.58763	3.75321	3.66015	4.32663	6
A_23_P252783	SLC2A8	10.2967	10.3611	10.393	10.35	10.5111	10.9428	6
A_32_P130630	SLC16A7	6.01775	5.64474	5.84853	4.95944	4.78442	5.73844	6
A_23_P17826	SLC5A1	11.4218	10.2835	10.7322	9.71719	10.0718	8.82907	6
A_33_P3235841	SLC22A20	4.03286	4.15337	4.60776	4.22707	4.01414	4.22959	6
A_23_P168551	SLC29A4	4.80959	4.69093	4.20807	4.24602	4.28691	4.02093	6
A_23_P328600	SLC24A6	8.16918	7.73549	8.00791	8.05595	8.25037	8.07767	6
A_23_P129433	SLC9A5	4.98284	4.98816	5.33622	5.05483	5.31335	5.16744	6
A_23_P159125	SLC16A5	11.1724	10.5599	10.9087	10.2707	10.2628	10.0263	6
A_23_P32029	SLC35D2	5.58994	5.86333	6.09893	6.56565	6.38037	6.53429	6
A_23_P139820	SLC11A2	8.96627	9.01247	9.62438	9.12661	9.16583	8.08068	6
A_23_P259357	SLC35E4	15.2307	15.3182	15.3507	15.5141	15.7356	15.7774	6
A_33_P3298062	ABCC5	9.3715	8.76317	9.11839	9.49655	9.30376	9.4794	6
A_23_P34460	SLC35A3	5.56617	5.56633	5.56899	5.77263	5.44375	5.1422	6
A_23_P11984	SLC6A9	8.06668	8.4012	8.23886	8.61012	7.11462	7.92152	6
A_23_P361569	SLC35F5	8.91596	8.92005	8.99377	8.67925	9.03879	8.71389	6
A_23_P219013	ABCC10	7.60499	7.30819	7.11221	7.51972	7.27618	7.81489	6
A_33_P3294603	SLC22A31	8.70698	8.82071	8.81296	8.66557	8.36059	8.33029	6
A_24_P191312	SLC1A4	6.84555	6.59726	5.61104	6.43911	6.38442	6.75603	6
A_23_P217208	SLC35A2	5.46006	5.34097	5.1561	5.03388	5.43126	4.87235	6
A_24_P15621	SLC6A10P	8.86822	8.54236	8.68988	9.0601	8.64405	8.80109	6
A_23_P41380	ABCE1	9.00325	9.02916	9.02408	8.56964	8.4997	8.62989	6
A_33_P3298850	SLC16A8	5.6214	6.0624	6.15043	5.90027	5.23364	5.62823	6
A_23_P39647	SLC4A3	5.94158	5.34186	5.18395	6.25064	6.18853	6.23655	6
A_23_P388900	SLC22A15	7.98353	6.82335	6.96178	7.51738	7.07692	7.47058	6
A_24_P359191	SLC6A6	6.42969	6.31325	6.39561	6.21788	5.78615	5.79115	6
A_23_P207507	ABCC3	6.49919	5.58577	6.42091	6.32758	6.39372	7.37974	6
A_24_P342829	SLC16A14	6.09053	6.03387	4.72729	5.93429	5.80488	6.32328	6
A_23_P120794	SLC7A4	6.95128	6.35827	6.99421	6.22634	5.22326	5.42415	6
A_23_P95130	SLC37A3	9.02309	9.29319	9.44493	9.09173	9.3794	9.3324	6
A_33_P3409159	SLC22A23	8.94976	8.7307	8.67831	9.00975	8.16482	8.74577	6
A_23_P94921	SLC20A2	10.1181	11.187	11.3764	10.3932	9.76557	10.4395	6
A_33_P3372563	ABCC10	5.64483	5.36938	5.82025	5.61351	5.26194	5.45059	6
A_24_P57528	SLC39A11	9.88551	10.029	9.88946	9.92554	9.77607	9.87473	6
A_23_P18317	SLC41A3	10.22	10.2326	10.3183	10.3602	10.587	10.6008	6
A_33_P3308263	DIRC2	7.64136	7.64707	7.53889	7.90458	7.44161	7.16512	6
A_23_P218988	SLC30A5	8.3351	8.32848	8.14725	7.80853	8.4269	8.62877	6
A_32_P126311	SLC38A9	8.95163	8.38148	8.42007	8.47942	8.43253	8.58937	6
A_23_P78018	ABCA5	8.50725	8.33336	8.24137	8.47674	8.27306	8.52561	6
A_33_P3297468	SLC34A3	6.54073	6.40276	6.47891	6.16453	5.85184	6.58252	6
A_23_P12113	FLVCR1	5.58077	6.07335	6.05385	5.9746	5.43473	6.16308	6
A_33_P3288871	SLC38A1	5.88825	5.63001	5.691	5.54103	5.54575	5.29515	6
A_23_P151975	RHCG	17.8117	17.3106	17.6046	16.9475	16.334	17.1685	6
A_23_P59988	SLC35G5	3.60997	4.06157	4.4788	3.63786	4.4701	4.0591	6
A_33_P3310301	SLC7A8	5.06945	5.2282	4.88497	5.42428	4.93647	5.21938	6
A_23_P160159	SLC2A5	7.38092	8.30575	8.38306	8.523	8.54195	9.22306	6
A_23_P165657	SLC20A1	9.2103	11.015	10.9057	10.7372	9.14754	11.4172	6
A_33_P3702055	SLC11A1	5.75253	5.64524	5.58765	6.01838	6.02783	5.78469	6
A_33_P3298043	ABCC6	4.27314	4.58189	4.38721	4.2393	4.30123	4.48579	6
A_33_P3372566	ABCC10	4.42943	3.70431	4.21253	4.57839	4.82912	4.98432	6
A_33_P3342305	ABCA8	4.97163	5.02132	5.0781	4.37172	5.28643	4.71922	6
A_23_P102508	SLC5A6	8.01861	7.7814	7.60552	7.51879	7.39683	8.04017	6
A_23_P154688	SLC4A11	9.9614	9.09885	8.65443	9.17489	8.69644	8.36822	6
A_23_P133694	SLC29A1	8.47203	8.42432	8.8959	8.22709	8.87993	8.60908	6
A_33_P3481987	SLC16A12	15.3803	15.4344	15.4496	15.6186	15.9689	15.9353	6
A_23_P216468	SLC1A1	3.87379	6.52187	6.24592	6.19642	6.44509	6.24197	6
A_33_P3211229	SLC35F2	5.50821	5.67105	5.25797	4.66219	4.36699	4.95644	6
A_23_P201918	ABCB10	7.21789	7.16429	7.35816	7.08106	7.29885	7.26485	6
A_33_P3281465	SLC5A6	8.01256	7.72837	7.95389	7.5318	7.81604	7.66693	6
A_23_P379630	SLC38A10	6.97178	6.55314	6.4287	6.5712	6.24577	6.56839	6
A_24_P46093	SLC6A6	7.26889	7.12316	7.25945	6.92704	7.19169	7.3791	6
A_23_P208416	SLC35E1	9.25518	9.40045	9.07813	9.3807	9.24612	9.30339	6
A_33_P3251093	SLC36A1	8.80137	7.99022	8.17834	7.98744	8.37408	8.05253	6
A_23_P255057	SLC35A5	6.71918	6.56667	6.6082	6.68701	6.43554	6.5113	6
A_33_P3337044	SLC2A6	8.47597	8.6586	8.60563	8.76156	9.22975	9.18123	6
A_23_P140876	ABCA3	6.85746	6.71727	6.96134	6.76221	6.89131	7.35667	6
A_23_P5903	SLCO4A1	7.85468	8.23441	9.30745	8.46156	8.03618	6.69521	6
A_23_P84929	SLC38A5	8.92637	8.77984	8.55385	8.71564	8.66761	9.28244	6
A_33_P3277447	SLC26A2	7.39688	7.3615	7.41273	7.82631	7.90018	8.48325	6
A_23_P46871	SLC29A3	5.88084	5.53266	5.52512	6.00447	6.4888	5.72141	6
A_24_P208345	SLC45A3	5.78778	4.84721	4.93394	4.35237	5.8543	5.24489	6
A_33_P3394710	SLC35A1	6.50412	6.58321	6.26947	6.5909	6.70285	6.3255	6
A_23_P213014	SLC2A9	7.72645	7.49817	7.69904	7.48826	7.0617	7.95741	6
A_33_P3235611	SLC46A1	5.7458	5.25624	4.91773	4.85022	5.8171	5.83981	6
A_24_P335620	SLC7A5	9.76666	9.71173	9.46147	9.53009	9.21432	9.98741	6
A_24_P58054	SLC9A8	7.76133	7.26245	7.40683	7.47015	6.82821	7.86	6
A_23_P75811	SLC3A2	9.99659	10.3678	10.024	10.25	9.74288	10.6903	6
A_33_P3278187	SLC35D2	6.66374	6.44225	6.92854	6.72202	6.1942	6.67511	6
A_24_P251688	ABCF3	10.3713	10.5836	10.5633	10.6023	10.5168	10.6254	6
A_33_P3386835	SLC20A2	6.72293	6.79319	6.79951	6.85061	6.36792	7.05862	6
A_23_P22915	SLC30A7	6.36645	6.59704	6.20641	6.33083	6.59444	6.77829	6
A_23_P22625	SLC9A6	9.00738	8.80148	8.73295	8.82732	8.70205	8.73574	6
A_23_P411806	SLC44A1	8.4505	9.10997	8.45104	8.84848	8.86301	8.66701	6
A_33_P3396270	SLC9A4	9.51905	8.96516	9.13924	9.18057	8.44463	8.60582	6
A_24_P330385	SLC22A17	5.98387	6.25503	5.87328	6.57772	6.66723	6.5872	6
A_23_P19778	SLC13A4	8.23013	8.75699	8.63283	7.57	7.09369	6.95626	6
A_24_P136866	SLC8A1	4.93749	5.44352	5.76156	5.31951	7.02158	5.35037	6
A_23_P202720	SLC35C1	10.8685	10.1039	10.5723	10.1801	9.93494	9.86746	6
A_33_P3474319	SLC37A2	10.6384	9.68868	9.71598	10.372	10.8227	9.15355	6
A_23_P363399	SLC38A1	9.50859	9.78947	9.65596	9.61365	9.55625	9.77337	6
A_23_P75786	SLC15A3	8.6137	8.27885	8.51026	8.0971	8.87289	9.4368	6
A_24_P253251	SLC7A1	9.04567	8.96065	8.92252	8.63316	8.25175	9.23827	6
A_24_P309594	SLC48A1	10.823	10.3212	10.472	10.3949	10.4152	10.2295	6
A_23_P109895	SLC26A6	7.02387	6.98772	6.60125	7.54919	7.25797	7.56262	6
A_23_P35970	SLC37A4	8.98113	8.88601	8.64632	8.95812	8.61998	8.98683	6
A_33_P3287203	SLC22A14	5.02638	5.15631	5.36429	4.70465	4.27018	4.17459	6
A_33_P3353552	SLC48A1	10.4518	10.1205	10.2844	9.98084	10.1212	9.75759	6
A_24_P142503	SLC47A1	5.3577	5.56376	5.31423	5.48657	5.86116	5.72471	6
A_23_P58912	SLC35A1	6.23782	6.24373	6.07062	6.54871	6.47649	6.54311	6
A_23_P135990	SLCO2A1	7.99782	9.6647	8.4638	9.37965	9.33798	10.4194	6
A_33_P3308512	SLC16A10	4.51553	5.92114	5.13237	5.14984	5.32306	4.87217	6
A_23_P65967	SLC38A7	8.61069	8.21857	8.2921	8.44366	8.44508	8.42789	6
A_23_P357929	SLC35D1	5.56956	5.67448	4.15323	5.16471	4.22528	5.43725	6
A_33_P3336780	ABCB8	6.39027	6.25512	6.13917	6.18945	6.05904	6.63879	6
A_24_P356916	SLC13A3	5.03305	4.91362	4.84493	5.16639	5.45588	5.41674	6
A_33_P3357530	SLC12A7	9.2114	9.7581	9.94844	9.69085	10.3742	10.3189	6
A_33_P3261737	SLC35A2	5.65565	5.6444	5.77446	5.33512	5.22122	5.48536	6
A_33_P3247082	SLC6A10P	5.78943	5.87169	6.08143	5.65527	5.28053	5.58849	6
A_23_P148556	ABCD1	4.39307	5.22261	4.72172	5.33837	5.37915	5.72502	6
A_24_P406986	SLC43A3	6.44835	6.69963	6.40696	6.44068	6.85506	7.20424	6
A_24_P257971	SLC27A4	9.26595	8.82793	8.5529	9.00846	8.8696	8.76801	6
A_23_P380326	SLC39A9	6.78211	6.84381	6.69231	6.56981	6.73891	6.64582	6
A_23_P213085	SLC10A7	5.88533	5.61662	5.90691	5.75635	5.3894	5.56069	6
A_23_P80778	DIRC2	9.94264	9.9063	10.0141	9.89897	9.64894	9.22509	6
A_24_P310616	SLC35A2	9.05258	8.9174	9.05585	8.87354	8.68028	8.82547	6
A_23_P571	SLC2A1	11.266	11.8753	11.8188	12.7396	11.6826	12.2206	6
A_23_P79978	SLC24A3	11.3166	11.4943	11.5832	10.9076	11.0738	11.335	6
A_24_P111054	SLC2A5	4.48826	4.61937	4.89339	4.40125	4.0751	4.31344	6
A_23_P160466	SLC19A2	8.95999	10.6224	9.91225	10.0591	9.00779	9.82088	6
A_24_P382467	SLC39A3	7.41773	7.41782	7.08344	7.35662	7.56164	7.63669	6
A_23_P59005	TAP1	11.5861	12.085	11.9093	12.0724	12.1516	13.0884	6
A_23_P30050	SLC30A9	6.49387	6.51029	6.35529	6.5378	6.62919	6.00133	6
A_33_P3270317	SLC18A3	4.71727	4.21328	4.76227	5.35992	4.64136	4.28644	6
A_33_P3368039	SLC35B2	8.08126	8.48047	8.06935	8.40147	8.58487	8.44332	6
A_23_P59950	SLC39A14	7.89622	7.8983	7.84053	7.77526	8.1347	8.19495	6
A_23_P37327	ABCD4	7.04964	6.98693	7.3255	7.02748	7.45356	7.33881	6
A_33_P3259022	SLC6A2	6.56468	6.23867	5.59972	5.85585	4.88007	4.3397	6
A_23_P218079	SLC38A2	10.85	11.3017	10.3433	11.0206	10.6402	11.496	6
A_24_P336276	SLCO3A1	8.00693	8.31045	7.92726	8.30691	7.94667	8.51928	6
A_33_P3242623	SLC7A11	6.08394	5.33927	4.96562	5.2061	4.75183	3.68754	6
A_23_P23575	SLC39A1	8.45721	8.26207	8.362	8.51177	8.65322	8.56208	6
A_33_P3367171	SLC22A8	5.67059	5.5111	5.93166	5.55606	5.40651	4.80958	6
A_33_P3254380	SLC9A7P1	6.28746	5.90998	5.8303	5.82906	5.78921	6.12715	6
A_33_P3406449	SLC15A4	8.11185	7.94742	8.04032	7.82764	8.18777	7.87605	6
A_33_P3212112	SLC12A6	9.29276	9.22783	9.53549	9.48991	8.92171	9.27492	6
A_21_P0005979	SLC45A4	4.85891	5.47588	5.46063	4.81923	5.6076	5.48627	6
A_23_P43504	ABCA2	5.25229	5.47788	5.73863	5.35369	5.44032	5.93398	6
A_23_P41424	SLC39A8	6.31436	7.25941	7.26954	7.41235	8.16468	7.49765	6
A_23_P147729	SLC35E3	7.86171	7.80675	7.50495	7.97715	7.58176	8.08988	6
A_23_P140450	SLC27A2	6.75814	6.12731	7.33702	6.38442	5.81625	5.3458	6
A_24_P122732	SLC41A1	7.69986	7.84147	8.0747	7.658	8.27968	7.69981	6
A_23_P55011	SLC38A10	10.7815	11.1786	11.0482	11.1355	11.374	11.2755	6
A_33_P3409154	SLC22A23	8.93915	8.90846	8.754	9.06399	8.52706	8.71704	6
A_23_P158725	SLC16A3	11.3063	11.878	12.329	11.862	11.8356	11.4097	6
A_23_P339098	SLC35F2	10.139	9.98064	9.70269	9.3196	9.41693	9.46819	6
A_23_P166297	ABCG1	4.7805	5.97565	5.97882	5.79115	6.03188	5.70599	6
A_33_P3268649	SLC2A11	5.02176	5.33846	5.35135	5.82083	5.17838	5.9464	6
A_33_P3367984	ABCA12	10.8901	9.05662	8.57938	9.73939	9.99364	8.96993	6
A_23_P139260	SLC22A18	10.9196	11.2624	11.3969	11.4017	11.3257	11.2083	6
A_33_P3422991	SLC36A4	5.09506	5.24611	5.41192	5.13771	5.02657	5.33045	6
A_33_P3245066	SLC35E2B	7.95892	8.31351	8.29386	8.41926	8.67503	8.58803	6
A_33_P3277110	SLC5A3	8.32463	9.368	8.57588	8.76346	9.05751	9.23655	6
A_23_P137097	SLC16A2	7.44675	7.90963	8.01823	7.72149	8.03166	7.42755	6
A_23_P364324	ABCA13	6.1452	6.09293	5.88031	6.40956	5.29455	6.26431	6
A_24_P942211	SLC35E2	9.61612	9.37189	9.29211	9.50792	10.145	9.9703	6
A_23_P159110	SLC35E3	6.99868	6.39382	6.6583	6.79553	6.52285	6.71639	6
A_24_P71373	SLC9A1	5.52684	5.68238	5.63778	5.80992	5.609	5.48894	6
A_33_P3261743	SLC37A2	7.53895	7.0466	6.82094	7.443	7.53455	6.24292	6
A_33_P3212102	SLC10A6	6.36305	7.49683	6.6254	6.95816	5.93279	7.13605	6
A_24_P365721	SLC6A14	6.69611	5.67405	7.40075	6.55079	6.52374	4.76462	6
A_24_P271323	SLC2A10	7.99596	7.67912	8.23513	7.61664	8.18064	7.2281	6
A_23_P99642	SLC7A7	3.91454	4.75858	4.97964	4.65621	5.67824	5.44336	6
A_24_P88565	SLC50A1	8.2295	7.8808	8.07009	7.91361	7.98036	7.18988	6
A_33_P3227691	SLC9A5	3.98394	3.9598	4.01832	4.51321	4.27228	4.2062	6
A_32_P46214	SLC9A9	9.29126	8.75098	8.57426	8.75548	9.05719	9.24788	6
A_33_P3273409	SLC35E1	11.2947	11.262	11.0535	11.2783	11.3433	11.0827	6
A_24_P378788	SLC35E1	7.02826	7.06163	6.98164	7.02882	6.62459	6.72541	6
A_24_P563545	SLC30A7	6.00302	6.0592	6.18162	5.7428	5.75268	6.01731	6
A_23_P51690	RHBG	7.66016	7.06133	8.6995	6.73571	7.21946	5.4963	6
A_32_P47754	SLC2A14	4.83895	6.78079	6.09186	7.09639	7.41062	7.67578	6
A_23_P150768	SLCO2B1	4.92135	5.60579	6.11874	5.38997	6.9986	5.63791	6
A_23_P107307	SLC13A2	4.93537	4.24442	4.43276	4.47953	4.20396	4.26067	6
A_24_P368575	SLC4A7	4.79784	5.33191	5.54804	4.82855	4.6648	5.25573	6
A_24_P227831	ABCC1	8.65249	7.60934	7.66283	8.06887	7.1213	7.24894	6
A_24_P126471	SLC12A9	5.67108	5.73809	5.53475	5.96853	5.83086	6.1572	6
A_24_P179816	SLC27A3	9.12784	9.48188	9.22848	9.7853	9.37269	9.95105	6
A_33_P3307955	ABCD3	7.94318	7.83607	7.52318	7.84078	6.45136	7.19507	6
A_23_P89455	SLC35B1	10.1657	9.60316	9.48027	9.56625	9.59998	9.35356	6
A_23_P128855	SLC39A2	10.975	10.4593	10.1881	10.4416	10.4907	10.4195	6
A_24_P286114	SLC1A3	8.92092	8.67765	8.35206	8.78331	8.72185	9.39578	6
A_23_P328022	SLC5A10	5.45682	5.69781	4.78212	6.05752	5.02465	5.23999	6
A_23_P23815	SLC30A1	8.05914	7.7925	8.24247	7.66116	7.65114	7.68097	6
A_24_P296508	SLC43A2	4.17466	3.51489	4.43309	3.58649	4.52409	4.33491	6
A_24_P235429	ABCA1	6.50159	7.06572	6.71137	6.79249	7.15955	7.38421	6
A_24_P113815	SLC35E2	6.5368	6.61206	6.90376	7.32554	7.60034	7.16564	6
A_23_P258221	ABCC5	10.295	10.5462	10.8731	10.8242	10.148	10.6623	6
A_33_P3282434	SLC16A1	5.30753	5.35672	4.3285	5.04693	4.87443	5.25078	6
A_33_P3298024	ABCC3	7.81225	6.32814	6.92122	6.62263	6.79534	7.24744	6
A_23_P217109	SLC31A2	10.3649	9.37383	9.59933	9.88091	9.87427	8.49656	6
A_23_P125078	SLC26A11	9.17074	9.34852	9.34639	9.65208	9.84428	9.73919	6
A_33_P3251108	SLC33A1	5.93006	5.42663	5.20076	5.20184	5.49821	5.55938	6
A_24_P350228	SLC22A23	7.23109	6.81429	7.05849	7.07953	6.44385	6.95843	6
A_23_P389391	SLC12A4	6.84605	7.58548	7.25197	7.58659	7.80941	7.49804	6
A_23_P32078	SLC28A3	4.62968	4.29934	4.13717	5.30004	4.57953	4.65516	6
A_23_P422212	SLC35F3	4.93896	6.23851	6.33713	5.48309	5.06131	5.73937	6
A_24_P588897	SLCO3A1	7.07528	7.04198	7.10941	6.89363	6.96646	6.89979	6
A_23_P24345	SLC39A13	10.2993	10.5569	10.7189	10.6378	11.5159	10.7662	6
A_23_P4611	SLC27A5	10.2807	9.73338	9.70946	9.25936	9.32014	9.36168	6
A_23_P363313	SLC16A11	6.32955	6.12618	6.16261	6.11709	5.87727	5.86554	6
A_33_P3404954	SLC38A6	7.99696	7.83085	7.96287	7.46304	8.0733	7.68656	6
A_24_P382489	SLC27A1	9.39649	9.86285	9.82836	9.88319	10.3428	10.3569	6
A_23_P205489	SLC7A8	7.28219	7.49025	7.197	7.80925	7.63376	7.72394	6
A_24_P13311	SLC15A4	7.50079	7.48414	7.4374	7.25249	7.61511	7.39515	6
A_23_P5441	ABCB6	9.40607	9.00521	9.01131	9.01701	8.94391	9.50789	6
A_24_P295963	SLC38A2	10.4741	10.8276	10.2158	10.6007	10.1533	10.9901	6
A_32_P21255	SLC30A4	7.79781	7.38569	6.9216	7.50114	7.10732	7.20599	6
A_24_P254278	SLC23A2	4.93522	5.61601	5.35232	5.30708	6.03437	5.75626	6
A_23_P145463	SLC35B3	6.03235	5.55161	5.69059	5.92335	5.8384	6.14496	6
A_23_P152791	SLC16A6	8.27211	7.42339	6.86329	7.16483	6.55947	7.15205	6
A_33_P3373273	SLC15A1	8.39672	8.24473	9.24	8.18871	8.43797	5.80936	6
A_33_P3242458	SLC41A3	8.02403	7.98086	8.02919	8.14793	8.20852	8.1208	6
A_33_P3325262	SLC6A8	9.43469	9.21404	9.23664	9.64089	9.19042	9.41029	6
A_33_P3227920	SLC16A4	4.68852	4.66389	5.4423	3.79344	5.8617	4.35351	6
A_33_P3307957	ABCD3	6.08549	6.38577	5.89246	6.21706	5.1667	5.73645	6
A_33_P3330549	SLC44A2	10.6877	10.3093	10.2376	10.3447	10.0919	10.1894	6
A_33_P3323048	SLC10A7	4.86646	4.96092	4.7458	4.81751	3.97711	4.97961	6
A_24_P928901	SLC31A1	7.70228	7.44299	7.56434	7.46588	7.63136	6.96728	6
A_24_P174755	SLC22A5	7.38934	7.30474	7.55518	7.91202	7.52684	7.924	6
A_33_P3402615	SLC6A9	12.1889	12.3945	12.5567	12.6231	11.6677	11.9114	6
A_32_P108474	ABCE1	5.93381	5.54639	5.73837	5.55546	5.59923	5.75809	6
A_23_P72157	MFSD7	9.24366	9.50746	9.09991	9.21872	9.848	8.83869	6
A_33_P3311170	SLC7A5P1	7.79206	8.01203	7.76926	8.11685	7.89023	8.33091	6
A_24_P261734	SLC38A1	9.49765	9.59679	9.53889	9.55304	9.50511	9.69048	6
A_23_P130735	SLC6A16	4.88254	5.85752	5.18777	5.54147	5.87928	5.88353	6
A_33_P3222892	SLC10A3	10.6318	11.0452	11.2944	11.1557	10.9723	11.0372	6
A_23_P70571	SLC39A7	9.09393	8.71561	8.92463	8.77084	8.87196	8.81758	6
A_33_P3418158	SLC2A8	6.56478	6.81559	6.59147	7.06463	6.9613	7.23946	6
A_23_P201248	SLC26A9	4.30178	6.50677	7.0275	5.10675	4.84759	5.78048	6
A_23_P82249	ABCB8	6.00834	5.94503	6.12965	5.73058	5.42046	6.04498	6
A_23_P92602	ABCA11P	4.16257	4.12331	3.9641	4.19457	5.35362	4.44445	6
A_33_P3394689	SLC6A2	5.97034	5.23386	3.93039	4.5975	4.51634	3.82463	6
A_32_P25437	SLC12A2	6.298	6.11017	6.15756	5.88753	6.13287	6.15916	6
A_33_P3358799	SLC35C2	10.6396	10.508	10.6336	10.502	10.3603	10.5089	6
A_23_P55998	SLC1A5	8.40705	8.59421	8.76372	9.1584	8.43069	9.37041	6
A_23_P104705	SLC29A2	5.0252	4.63462	4.67379	4.59069	3.51661	5.23582	6
A_23_P86838	SLC36A4	6.81237	7.21178	7.09901	6.68778	7.19584	6.65354	6
A_23_P78750	SLC17A7	5.88228	5.82854	6.01588	5.73757	5.34301	5.71046	6
A_23_P251660	ABCF1	10.461	10.8101	10.4665	10.8332	10.6071	11.0575	6
A_23_P86195	SLC44A3	8.02293	7.40681	8.04399	7.05057	6.78996	6.88151	6
A_23_P17695	SLC37A1	8.8204	8.53804	8.39067	8.34305	8.09928	8.46974	6
A_24_P10657	SLC44A2	9.74497	9.37799	9.43516	9.47422	9.37004	9.26299	6
A_23_P171258	ABCB7	8.75145	8.71718	8.65359	8.68967	8.51898	8.64106	6
A_33_P3217495	SLC5A2	5.16818	5.34259	5.35118	5.36963	5.42847	5.01623	6
A_33_P3298057	ABCC5	6.47001	6.71352	7.04905	7.19457	6.21002	7.02541	6
A_23_P253389	SLC4A2	6.91736	7.24081	6.79262	7.54908	7.32739	7.63078	6
A_33_P3250953	SLC35B4	5.48062	4.73884	4.99931	4.65231	5.29124	5.45254	6
A_24_P321068	SLC31A1	6.81246	6.45516	5.91574	6.69194	6.5485	6.1089	6
A_33_P3416321	SLC17A5	9.37051	9.30983	9.59028	9.39807	9.76069	9.39365	6
A_23_P69840	SLC35A4	9.51589	9.48023	9.20134	9.49684	9.27869	9.37417	6
A_23_P41789	SLC27A6	6.18756	7.85913	7.16402	7.62378	6.72239	8.36243	6
A_33_P3265549	SLC19A1	3.96162	3.60081	3.47613	3.59253	3.9469	4.36775	5
A_33_P3332414	ABCB1	3.38306	3.95724	3.73163	3.69306	4.70736	4.40861	5
A_23_P77908	SLC47A2	5.4731	4.38583	3.68385	5.14491	3.1555	4.39727	5
A_23_P27353	SLC14A2	4.76584	3.96588	3.84312	4.35956	3.15649	3.52708	5
A_23_P156180	SLC22A4	3.41102	4.19104	4.20742	4.22138	4.25406	4.95854	5
A_23_P165668	SLC35F5	3.79517	4.4041	3.96266	4.15781	3.29783	4.32659	5
A_24_P355626	ABCG4	4.18823	5.81844	5.16066	5.4313	4.38899	2.37848	5
A_23_P205913	SLC24A1	3.4529	4.1721	3.55683	4.24248	4.33566	4.00827	5
A_24_P820037	SLC6A17	3.67151	3.62154	3.51336	3.61742	3.65746	2.96811	5
A_33_P3329795	SLC22A20	4.24904	3.82489	4.14696	3.75533	3.08922	3.55664	5
A_33_P3398912	SLC2A6	3.83696	3.41927	3.60841	3.76894	5.24267	4.61742	5
A_33_P3272744	RHBG	5.3886	4.27524	6.49218	4.25368	4.77158	2.58302	5
A_33_P3422897	ABCA1	3.95467	4.77379	4.46645	3.33034	4.96656	4.06208	5
A_23_P52939	SLC43A1	3.36987	3.68097	3.9429	3.67391	5.78392	5.17182	5
A_33_P3210418	SLC5A10	4.5227	4.72665	2.96024	5.35454	4.02338	4.32093	5
A_32_P23624	ABCB10	4.22412	3.68196	4.30312	3.99518	3.14283	3.58796	5
A_23_P28246	SLC23A3	4.05938	3.2436	3.28073	4.73842	5.03312	4.16694	4
A_23_P140373	FLVCR2	5.31634	3.41916	3.66667	4.46538	4.65661	2.59459	4
A_23_P118741	SLC16A13	4.74668	3.49219	3.40377	4.17897	3.85493	3.81664	4
A_33_P3224660	ABCD1	3.15158	3.96528	3.98299	3.76526	3.23643	4.47912	4
A_33_P3265270	SLC17A5	4.49905	3.85039	4.18938	3.95742	3.49316	3.43008	4
A_33_P3292621	SLC27A1	3.36014	3.30919	3.53173	3.52834	3.74249	3.62772	4
A_33_P3400217	SLC4A1	3.26334	4.18457	3.99672	3.50938	3.16075	3.55462	4
A_23_P341567	SLC9B2	3.59954	3.23431	3.76961	3.14536	4.33474	4.66437	4
A_33_P3303772	SLC6A3	4.3021	4.07044	4.40273	3.83531	3.48377	3.4301	4
A_24_P350759	SLC1A2	3.89072	3.55546	4.29628	3.51592	3.07382	3.43093	4
A_24_P81900	SLC2A3	2.38806	3.23979	3.10382	4.27391	3.98884	4.84887	3
A_23_P15272	ABCC6	3.61232	2.75872	4.09182	3.50316	3.34268	3.25362	3
A_33_P3403399	SLC47A1	3.40561	3.73132	3.29825	3.70891	3.9685	3.3748	3
A_23_P80954	SLC26A1	3.67279	3.38706	3.7659	3.6648	3.20952	3.25599	3
A_33_P3274560	SLC19A3	3.52858	3.39519	3.27329	3.14364	3.51605	4.35987	3
A_23_P390032	SLC35G1	3.68635	4.04915	3.6641	3.34228	2.59304	2.87358	3
A_33_P3224190	SLC29A4	4.20791	3.54399	3.34038	3.65869	2.48346	2.57127	3
A_33_P3262156	SLC8A1	3.56474	3.25503	4.06213	3.51889	3.27799	2.63217	3
A_23_P116642	SLC26A10	3.45959	3.16384	3.39447	4.04464	4.98397	3.75409	3
A_23_P404565	SLC2A11	3.18946	3.01379	2.67238	3.60951	3.5116	3.91357	3
A_33_P3361067	ABCG2	2.74869	3.21051	3.78713	2.82858	4.06957	2.87001	2
A_23_P128094	ABCB9	3.66195	3.1956	3.03092	3.77193	3.41147	3.29	2
A_23_P24774	ABCC8	2.2419	2.5525	3.39111	3.14995	4.15217	3.74197	2
A_33_P3344801	SLC2A1	3.40409	3.19511	2.95311	4.05493	1.77249	3.89888	2
A_23_P144123	SLC22A13	2.96388	3.56433	3.31694	3.71327	2.47808	3.38397	2
A_33_P3385006	SLC39A5	3.1592	3.33404	3.54774	2.78094	3.67932	3.42463	2
A_32_P309404	SLC22A3	2.80274	2.42687	3.68044	2.11194	3.746	2.7377	2
A_23_P302568	SLC30A3	3.01515	3.40617	3.5763	3.48277	3.46755	3.85487	2
A_23_P418562	SLC6A11	3.43361	3.20461	2.85166	3.929	1.94166	4.12816	2
A_23_P325562	SLC1A7	2.87578	3.20637	3.33563	3.62226	4.21321	2.82507	2
A_24_P178503	ABCC9	2.69455	3.35486	3.00823	3.52139	5.03879	3.39132	2
A_23_P82523	ABCB1	2.43368	3.0415	3.38719	2.77091	3.52448	2.93274	1
A_33_P3361412	SLC22A15	3.57027	2.38947	3.42172	2.73934	2.19404	2.568	1
A_23_P205074	SLC46A3	3.1373	2.59697	3.73073	2.51656	3.25897	2.46079	1
A_23_P215720	CFTR	2.86427	3.01466	3.5055	3.35934	2.69337	2.16723	1
A_23_P24149	SLC39A12	2.66027	2.02337	2.05932	2.52893	3.7524	2.14462	1
A_23_P52499	SLC18A2	3.1028	3.17929	3.37579	3.31511	4.27904	2.27907	1
A_33_P3390637	SLC23A3	2.99285	2.84418	3.51489	2.91804	2.71386	2.34135	1
A_23_P155487	SLC38A3	2.88163	3.24083	3.35934	3.53682	3.07021	2.85936	1
A_23_P77980	SLC4A1	3.29173	2.45262	3.66686	2.96081	2.23177	3.07503	1
A_23_P342641	SLC44A5	2.05332	2.35649	3.32794	2.2159	2.27472	3.72142	1
A_23_P161968	SLC22A10	3.54288	2.962	2.99534	2.71191	2.79473	2.47196	1
A_23_P119763	ABCG5	2.45462	3.06125	2.35264	2.40253	3.66923	2.2869	1
A_33_P3383331	SLC35A3	2.77475	3.51069	2.77526	2.77975	2.74278	2.67419	1
A_24_P29117	SLC26A1	3.03063	2.51231	2.89042	2.89117	2.985	3.57612	1
A_23_P14667	SLC28A1	2.93659	3.58399	2.63217	2.63503	2.86093	1.6944	1
A_23_P389532	SLC35G3	4.23305	2.17732	2.20946	3.39694	1.67183	3.20403	1
A_33_P3317005	SLC11A1	3.36518	2.48261	2.04494	3.27296	3.60534	2.40794	1
A_33_P3330236	ABCD1	3.863	2.91034	3.02986	3.38215	3.31878	3.41255	1
A_33_P3269885	SLC30A10	3.38829	3.37838	3.00121	3.32491	3.05183	3.55634	1
A_33_P3331125	SLC2A12	2.7	3.16384	2.87837	3.31766	3.07463	3.73776	1
A_24_P397435	SLC6A3	2.25993	1.93904	1.85815	2.10917	3.98393	1.86702	1
A_33_P3229156	SLC17A9	2.38777	2.77275	3.22494	2.52081	4.31223	2.56373	1
A_24_P159312	SLC7A6	2.56795	3.18031	3.70368	2.47036	3.05601	2.61314	1
A_32_P358887	SLC4A4	2.04151	3.16411	3.99251	2.73838	2.913	1.88927	1
A_33_P3283824	SLC39A8	2.16404	2.92267	2.49073	2.5874	3.95863	2.39626	1
A_23_P259049	SLC45A2	2.31869	2.56683	2.83	2.8277	4.10043	2.59394	1
A_33_P3364089	SLCO1B3	2.42789	2.14927	2.19648	2.62432	1.99976	2.7856	0
A_23_P135669	SLCO5A1	2.1463	2.07821	2.04737	2.11364	2.10711	2.19398	0
A_23_P25698	SLC10A1	2.31433	2.61802	2.2875	2.81113	2.10815	2.36849	0
A_23_P388124	ABCD2	2.61006	2.37791	2.40368	2.42435	2.4758	2.01338	0
A_23_P397480	ABCC13	2.18382	2.18568	2.16992	2.18449	2.14919	2.17835	0
A_23_P116624	SLC6A5	3.44372	3.12542	3.37674	2.9146	2.47005	3.02524	0
A_23_P37914	SLC5A11	2.74498	2.6378	3.14716	2.16408	2.91546	3.01631	0
A_33_P3318148	SLC24A4	2.43242	2.56767	2.02486	2.32693	2.22253	2.34006	0
A_24_P203765	SLC1A7	2.42803	2.85385	3.08897	2.37605	1.7148	2.42766	0
A_33_P3242693	SLC22A11	2.11668	2.31473	2.51445	2.21225	2.29138	2.16931	0
A_23_P100539	ABCC6	2.66241	2.67673	3.00038	2.52942	3.14559	2.71738	0
A_23_P133036	SLC34A2	2.2845	2.27178	2.13749	2.27986	2.17295	2.18553	0
A_23_P118615	ABCA8	2.55366	2.60973	2.96431	2.53744	2.55784	2.48519	0
A_33_P3241393	SLC4A5	2.62404	2.65508	3.31007	2.70333	3.06889	2.78527	0
A_33_P3235207	SLC38A4	2.26697	2.17775	2.18174	2.4537	2.49937	2.33028	0
A_33_P3268652	SLC2A11	2.85683	2.86905	2.7105	2.27758	3.04891	2.10207	0
A_24_P167654	SLC8A3	2.05404	2.03114	2.06324	2.6442	2.5217	2.46864	0
A_32_P182812	SLC6A4	3.28731	3.07818	2.39882	2.37437	2.79518	2.3362	0
A_23_P142250	SLC7A9	2.25909	2.05767	2.04193	2.08308	2.08507	2.14906	0
A_33_P3357516	SLC10A7	2.04792	2.32211	2.2915	2.09153	2.27395	2.4066	0
A_23_P111395	SLC22A2	2.50023	2.55465	2.51471	2.46966	2.3228	2.29487	0
A_23_P112173	SLC24A2	2.23676	2.41165	2.1575	2.33815	1.98924	2.2388	0
A_24_P75680	SLC4A8	2.27414	2.71659	2.47765	1.95988	1.90291	2.02995	0
A_23_P256572	RHAG	2.21577	2.27799	2.1537	2.28387	2.12609	2.55324	0
A_24_P355057	SLC13A1	2.43724	2.49713	2.51572	2.29586	2.33861	2.64496	0
A_23_P204801	SLC41A2	2.80123	2.26755	3.10184	1.82731	2.60822	1.59908	0
A_24_P242581	SLC5A9	2.51449	2.51151	2.63295	2.36972	2.39307	2.41945	0
A_24_P383356	SLC39A14	2.04232	2.08455	2.11819	2.1231	2.1281	2.19934	0
A_33_P3293675	SLC12A7	2.45248	2.26347	2.34565	2.24573	2.40637	2.04079	0
A_23_P123228	SLC26A3	2.10783	2.22698	2.1335	2.29342	2.22607	2.2103	0
A_32_P223059	SLC45A1	2.25029	2.26099	2.37328	2.18506	2.12444	2.18371	0
A_23_P42004	SLC22A16	2.20629	2.60425	2.98848	2.47745	2.09428	2.79069	0
A_23_P111662	ABCB5	2.51902	2.35292	2.31923	2.32475	2.49842	2.27013	0
A_23_P56494	SLC38A11	2.13649	2.1482	2.15774	2.39759	2.08743	1.95632	0
A_21_P0000067	SLC34A1	2.30338	2.06835	2.41796	2.45212	1.76476	2.10977	0
A_23_P47199	SLC22A11	2.5242	2.1987	2.71169	2.09828	1.77032	1.79421	0
A_33_P3408172	SLC15A5	2.01788	2.00407	2.2491	2.29023	2.06312	2.09022	0
A_24_P217234	SLC3A1	2.61671	2.22396	2.37112	2.24373	1.95781	2.26029	0
A_33_P3417670	SLC24A1	2.45826	2.47515	2.48767	2.42151	2.12876	2.71207	0
A_24_P182892	SLC19A3	2.5298	2.46569	2.52073	2.36782	2.45639	2.62401	0
A_32_P381593	SLC26A7	2.54285	2.55504	2.59406	2.53202	2.46046	2.42618	0
A_23_P503010	SLC24A4	2.38996	3.03993	3.12755	3.31049	3.22706	2.45887	0
A_33_P3261298	SLC6A7	2.07069	2.07167	2.48266	2.28315	2.5342	2.2	0
A_23_P140009	SLC10A2	2.35784	2.99341	1.99402	2.34907	2.36526	2.22645	0
A_33_P3361112	ABCG8	2.21258	2.17723	2.25062	2.15001	2.14512	2.14502	0
A_23_P55616	SLC14A1	2.46848	2.68253	3.35588	2.60699	2.85165	2.88782	0
A_23_P39703	ABCB11	2.53193	2.31441	2.45534	2.45972	2.26616	2.21669	0
A_33_P3241696	SLC45A2	2.53018	2.16959	3.39861	2.85929	2.54031	2.27081	0
A_33_P3332052	SLC26A11	2.7276	2.55408	2.73329	2.95679	2.62492	2.97817	0
A_24_P924816	SLC2A13	1.9929	2.00162	1.99505	1.99591	1.99091	1.99398	0
A_23_P44569	ABCC2	2.35584	2.78156	2.51308	3.01335	3.16608	3.07668	0
A_24_P124647	SLC17A8	2.22607	2.1271	2.18755	2.11534	2.03014	2.13218	0
A_24_P156748	SLC30A2	2.40032	2.70531	2.71581	2.88585	2.93653	3.13021	0
A_21_P0011428	SLC9B1	2.06476	2.24324	2.23432	2.38868	2.26754	2.06608	0
A_24_P212234	SLC6A18	2.89579	3.09118	3.0971	3.46207	2.38771	3.28343	0
A_24_P16913	ABCC4	2.86338	2.55889	2.80397	2.362	2.76818	2.47031	0
A_33_P3317797	SLC2A5	2.44716	2.67929	2.51531	2.93171	1.70862	3.16299	0
A_24_P934387	SLC5A12	2.11947	2.23151	1.97068	2.20458	2.59915	2.16673	0
A_24_P13024	SLC16A12	1.97601	2.0198	1.99657	1.942	1.99401	2.17545	0
A_23_P98616	SLC22A6	2.10936	2.07297	2.05894	2.20282	2.11236	2.28894	0
A_33_P3239052	ABCA17P	1.98283	1.9812	1.9732	1.97892	2.02837	1.97239	0
A_33_P3399598	ABCD4	3.05784	2.36651	2.62553	2.77668	2.37686	2.06017	0
A_33_P3316770	SLCO1A2	2.51913	2.39704	2.31205	2.40589	2.24193	2.13863	0
A_33_P3417081	ABCA17P	2.36197	2.40767	2.30119	2.24223	2.26247	2.29352	0
A_23_P116868	SLCO1C1	2.39337	2.10393	2.3153	2.06755	1.89198	2.05982	0
A_33_P3402313	SLC9A4	3.17652	2.2346	2.55977	2.32116	1.81354	2.01484	0
A_24_P247732	SLC5A6	2.86399	3.26068	2.77504	2.98815	2.11163	3.22213	0
A_24_P321581	SLC38A4	2.02347	2.01504	2.01811	2.16754	1.94221	2.14562	0
A_23_P307570	ABCC13	2.4465	2.32035	2.30424	2.46352	2.43687	2.33006	0
A_23_P66739	SLC13A5	2.76523	2.36214	2.18268	2.80616	2.91416	2.46421	0
A_23_P24294	SLC17A6	2.18259	2.20908	2.19421	2.18906	2.18777	2.18974	0
A_33_P3367731	SLC24A2	2.60286	2.75668	2.32265	2.34292	2.39755	2.51371	0
A_21_P0011507	SLC22A31	2.16135	2.1711	2.20261	2.07605	2.32959	1.89322	0
A_32_P88262	SLC7A14	2.21091	2.21502	2.14965	2.31138	2.07989	2.4965	0
A_33_P3267059	SLC9A1	2.01735	1.98598	1.98528	1.97627	1.98824	1.9767	0
A_33_P3376350	SLC38A10	2.0798	2.07674	2.03849	2.0786	2.07291	2.08677	0
A_23_P58729	SLC34A1	2.95508	2.41114	2.22637	2.67269	2.61112	2.51509	0
A_33_P3379926	SLC17A4	2.55634	2.16249	2.2981	2.02845	2.03644	1.98105	0
A_23_P368691	ABCC9	2.31565	2.33852	2.4024	2.11065	2.56712	2.26041	0
A_33_P3237210	SLC35A4	2.10699	2.13871	1.95606	1.97235	1.96007	1.98364	0
A_21_P0010940	SLC9B1	2.18841	1.94562	1.9484	1.94834	2.21115	2.0601	0
A_33_P3259293	SLC37A3	2.37364	2.53092	2.27185	2.3929	2.30693	2.36574	0
A_24_P657226	SLC9B1	2.14769	2.00822	1.93677	2.04667	2.00946	2.12895	0
A_23_P139669	SLC2A3	2.21155	2.29256	2.28049	2.15554	2.34198	2.53571	0
A_24_P926507	SLC14A1	1.87632	2.1417	2.23177	2.14337	2.09578	2.26042	0
A_23_P336663	SLC7A13	2.24317	2.11332	2.05014	2.23273	2.07946	2.19755	0
A_33_P3400700	SLC26A5	2.07019	1.93915	2.00942	1.9843	1.89087	2.50087	0
A_24_P405705	SLC2A2	2.0206	1.96359	1.96692	1.96368	1.95261	1.95562	0
A_32_P69802	SLCO1A2	2.15587	2.1351	2.10305	2.084	2.1667	2.14464	0
A_23_P64980	SLC6A13	2.27632	2.19698	2.39615	2.36595	1.72066	2.61208	0
A_33_P3354514	SLC2A13	2.16831	2.15425	2.13244	2.12875	2.2105	2.12219	0
A_33_P3274562	SLC19A3	1.98917	2.18479	2.40359	2.30403	3.41202	2.35532	0
A_33_P3221753	SLC22A25	3.19894	3.22416	2.36631	2.53312	3.05611	2.7561	0
A_32_P151263	SLC2A4	2.18533	2.89518	2.14187	2.36522	3.47057	2.08689	0
A_33_P3385266	ABCC6	2.58615	2.37693	2.62292	2.31583	2.55852	2.44333	0
A_24_P342807	SLC30A6	1.94696	2.13925	1.96573	2.03336	1.83103	2.10373	0
A_33_P3400699	SLC26A5	2.77369	2.91348	3.16071	2.69823	2.71877	2.90216	0
A_33_P3418417	SLC3A1	2.23395	2.24689	2.23636	2.23225	2.21186	2.24554	0
A_24_P8165	SLC15A1	2.18434	2.33013	2.41277	2.16055	2.46596	1.9136	0
A_33_P3337554	ABCB5	2.06393	2.52447	2.02835	2.26876	1.95046	2.26077	0
A_24_P21829	SLC22A24	1.96744	2.21228	2.01611	2.10757	2.06141	1.85243	0
A_33_P3396089	SLC38A6	2.22567	2.21789	2.16238	2.16417	2.11574	2.18704	0
A_33_P3353365	SLC17A4	2.46045	2.38578	2.72467	2.71614	2.61657	2.41314	0
A_23_P92107	SLC15A2	2.35273	2.39268	2.89766	2.58282	2.45409	1.85468	0
A_24_P136029	SLC12A1	2.10386	2.18531	2.20306	2.12632	2.21846	2.22173	0
A_24_P98047	SLC16A10	2.4291	3.0012	3.00774	2.55445	3.32028	2.25489	0
A_33_P3408743	SLC16A12	1.98669	2.00579	1.9715	2.37138	2.06749	2.19598	0
A_33_P3384988	SLC30A5	2.35907	2.36158	2.23447	2.13264	2.8135	2.13818	0
A_33_P3337549	ABCB5	2.12874	2.46405	2.35823	2.6686	2.75172	2.3816	0
A_23_P314811	SLC10A4	2.47353	2.09712	2.14431	2.60093	2.00107	2.30015	0
A_24_P20369	SLC6A20	2.04815	2.03586	2.04323	2.0349	2.04709	2.04045	0
A_33_P3410484	SLC13A3	3.21372	2.83228	2.63989	3.24679	2.39425	3.08567	0
A_23_P59051	SLC17A2	2.12659	2.10257	2.12661	2.32657	1.97659	2.24509	0
A_33_P3418426	SLC3A1	2.2084	2.01625	2.19483	1.93388	1.87646	1.90849	0
A_24_P304311	SLC22A8	2.03524	2.01936	2.0029	2.08776	2.00582	2.1591	0
A_23_P89422	ABCA10	2.23951	2.19764	2.39856	2.19919	2.18274	2.49106	0
A_33_P3227696	SLC9A5	2.2955	2.18083	2.19136	2.2427	2.32868	2.26513	0
A_23_P368067	TAP2	2.62498	2.23173	2.06902	2.10885	2.22318	2.04847	0
A_24_P713267	SLCO1B7	2.00939	2.03607	2.02256	1.98399	2.00685	2.14655	0
A_23_P70102	SLC36A2	2.04718	2.03427	2.04265	2.08772	2.04574	2.03953	0
A_24_P268685	SLC6A1	2.23427	2.14569	2.06871	2.43139	2.2309	2.36364	0
A_23_P42189	SLC17A1	1.98412	1.98333	1.98352	1.9817	1.9732	1.98255	0
A_24_P109838	SLC6A15	2.26157	2.51788	2.16568	2.26729	2.02344	2.28565	0
A_23_P73413	SLC26A7	2.22404	2.07551	2.13628	2.02533	2.05025	1.97776	0
A_33_P3419998	SLC4A8	2.08191	2.69247	2.05009	2.24608	2.3148	2.32252	0
A_33_P3381186	SLC5A8	2.00882	2.0085	2.01621	1.99346	2.15329	1.96142	0
A_33_P3281537	SLC27A3	1.98549	2.04736	2.12688	2.18185	2.15555	1.94994	0
A_33_P3780987	SLC36A3	2.05161	1.92122	1.85532	2.03103	1.94701	2.15986	0
A_33_P3368506	SLC38A8	1.94776	2.18901	1.97576	1.99763	1.99045	1.98644	0
A_21_P0000624	SLC6A13	2.19797	1.86596	2.05513	2.16307	3.03054	2.20785	0
A_24_P179467	SLC1A6	2.17174	2.2984	2.61687	2.46487	3.15394	2.39476	0
A_33_P3210399	SLC14A1	1.94476	2.28521	2.18545	2.53081	2.47938	2.21697	0
A_24_P307653	SLC6A15	2.16406	2.03517	2.04088	1.93055	2.52979	2.07096	0
A_33_P3403162	SLC18A1	2.13074	1.9833	1.98914	1.99184	1.98986	1.98982	0
A_33_P3299339	SLC5A7	2.26262	2.29429	2.3111	2.24959	2.29934	2.28482	0
A_23_P30582	SLC9A3	2.94797	3.11084	3.48699	2.32763	2.31303	3.1144	0
A_33_P3319542	SLC8A2	3.43158	2.83194	2.76201	3.06822	2.61767	2.03457	0
A_23_P48816	SLC28A2	1.96608	1.9687	1.96884	1.96327	1.96821	1.99365	0
A_23_P93213	SLC22A7	2.17275	2.25111	2.19446	2.06979	2.07215	2.11205	0
A_24_P287766	ABCC12	2.08878	2.07425	2.08149	2.11396	2.06057	2.00799	0
A_33_P3241388	SLC4A5	2.36657	2.27657	2.54102	2.77313	2.42269	2.90785	0
A_32_P154342	SLCO4C1	2.24449	1.97372	1.99195	2.20779	1.92737	2.17893	0
A_24_P684183	SLC44A4	2.32703	2.16718	2.23711	2.29231	2.74624	1.99777	0
A_33_P3415972	SLC35F1	2.27307	2.24199	2.27968	2.19246	2.37775	2.19168	0
A_23_P76386	SLC6A12	2.16108	2.13444	2.23321	2.23502	2.33651	2.23836	0
A_33_P3283813	SLC30A8	2.42715	2.02745	1.79415	2.4178	1.87312	2.30374	0
A_24_P350683	SLC9A1	2.4654	2.23011	2.69645	2.89803	2.40147	3.17294	0
A_23_P57492	SLC5A4	2.14829	2.14244	2.15575	2.12536	2.15134	2.1324	0
A_33_P3389518	ABCC2	2.14352	2.12633	2.32741	2.16016	2.02961	2.26767	0
A_33_P3266390	SLC28A1	2.66305	2.26094	2.351	2.14343	2.27257	1.98186	0
A_33_P3317009	SLC11A1	2.12288	2.10473	2.11643	2.12251	2.10953	2.11588	0
A_23_P159851	SLC7A3	2.26041	2.06496	1.96777	2.29417	2.98619	2.03688	0
A_33_P3355326	SLC17A2	2.18441	2.07547	2.1895	2.16934	2.61064	2.36397	0
A_23_P331560	SLC26A4	1.97275	1.99978	2.01396	1.98782	2.29535	2.01427	0
A_33_P3236297	SLCO1A2	2.11218	2.13439	2.12736	2.15748	2.12817	2.07086	0
A_33_P3273143	SLC35E4	2.30811	2.54535	2.26157	2.52715	2.53666	2.72751	0
A_24_P314786	SLC4A10	2.21845	2.19842	2.27443	2.2602	2.04019	2.23943	0
A_23_P355377	SLC12A5	2.18779	2.23066	2.11184	2.15372	2.2705	2.17242	0
A_33_P3780983	SLC34A3	2.36394	2.00857	1.96477	2.05556	2.07548	2.13415	0
A_23_P150590	SLC22A9	2.31586	2.3211	2.39913	2.54438	2.34356	2.24021	0
A_23_P101774	SLC5A5	3.27891	2.65466	2.59007	2.84397	2.00153	2.44725	0
A_33_P3288624	SLC7A14	1.96231	2.47146	1.98836	2.01353	2.0132	2.0507	0
A_23_P72912	SLC4A8	2.01645	2.0592	2.03811	2.07632	2.02435	1.98298	0
A_33_P3416331	SLC10A5	2.46753	2.25221	2.32809	2.25782	2.42132	2.07866	0
A_24_P385190	SLC4A1	2.23121	2.60484	2.61475	3.41179	2.00441	3.21308	0
A_23_P255695	SLC17A3	2.55527	2.20062	2.48321	2.05439	1.82942	2.06635	0
A_23_P413888	SLC35F1	2.17269	2.48869	2.30478	2.14607	2.85722	2.25321	0
A_21_P0010939	SLC9B1	2.00122	2.02656	2.03401	2.0418	2.28759	2.11735	0
A_23_P33168	SLC18A1	2.03349	2.03127	2.03788	2.02974	2.02588	2.02774	0
A_33_P3336760	ABCB4	2.56779	2.86759	2.73389	2.36181	3.41739	2.55412	0
A_23_P257176	SLC4A9	2.11003	2.20769	2.12895	2.10516	2.53992	2.22473	0
A_33_P3392320	SLC6A15	2.32456	2.18651	2.2593	2.06838	2.22037	2.10773	0
A_33_P3376947	ABCB9	2.73546	2.81374	2.56602	3.1624	3.01646	2.70495	0
A_33_P3251672	ABCA2	2.33224	2.22518	2.26335	2.29484	2.11873	2.74978	0
A_23_P415611	SLC9B1	2.55729	2.73863	3.08243	2.78039	2.93434	2.60796	0
A_23_P163075	SLC35F4	2.29268	2.59681	2.638	2.40106	3.17504	2.60061	0
A_23_P323943	SLC5A12	2.30699	2.35473	2.53437	2.17605	2.37662	2.80404	0
A_33_P3316721	SLC22A12	2.38224	2.34549	2.60014	2.0736	2.42498	2.20989	0
A_23_P145569	SLC22A1	2.65283	2.87923	2.61051	2.67808	2.55523	2.72697	0
A_33_P3225111	SLC12A5	2.77488	2.69278	2.87524	2.60189	2.2354	2.4802	0
A_24_P930111	SLC4A10	2.1614	2.22314	2.26617	2.29226	2.52834	2.27738	0
A_23_P128254	SLCO1B1	2.46683	2.48047	2.52189	2.36274	2.60508	2.32576	0
A_33_P3261019	SLC9A2	2.76148	2.39376	2.32797	2.53263	2.86599	2.48855	0
A_23_P307382	SLC32A1	2.1825	2.12993	2.37365	1.96163	2.01904	2.07948	0
A_23_P77653	SLC12A3	2.15216	2.17266	2.21352	2.06	2.12142	2.13576	0
A_23_P253451	SLC7A14	2.16015	2.12073	2.16001	2.13936	2.10861	2.22194	0
A_33_P3220545	SLC6A19	2.69221	2.90971	2.5699	2.66824	2.60466	2.91	0
A_21_P0000065	SLC1A3	2.23362	2.38117	2.36962	2.11985	2.39056	2.13082	0
A_21_P0012275	SLC9B1	2.06971	2.07378	2.07929	2.05937	2.06472	2.06087	0
A_23_P300090	SLC10A7	2.08582	2.08226	2.09456	2.07694	2.16813	2.08753	0
A_33_P3282454	SLC12A1	2.22178	2.20371	2.26675	2.17314	2.20088	2.17175	0
A_33_P3238425	SLC2A7	2.43866	2.49649	2.07504	2.37624	2.37199	2.29219	0
A_23_P75820	SLC22A24	2.22099	2.20459	2.2525	2.1771	2.20256	2.17488	0
A_33_P3400688	SLC24A5	2.34871	2.60257	2.75243	2.57697	3.33643	2.69287	0
A_33_P3418421	SLC3A1	2.44904	2.30158	2.12182	2.17399	2.55907	2.15852	0
A_33_P3293187	SLC14A2	2.33471	2.68723	2.3023	2.13942	2.35905	1.87913	0
A_33_P3369799	SLC35D3	2.21937	2.6438	2.08635	2.56022	2.47317	2.34046	0
A_23_P92885	SLCO6A1	2.2107	2.30481	2.17512	2.13884	2.16361	2.14235	0
A_23_P30950	SLC26A8	2.7771	2.49955	2.49858	1.97717	3.21186	2.24314	0
A_23_P141076	ABCC11	2.12941	2.39466	2.2486	2.20063	2.28204	2.32906	0
A_23_P108075	SLC7A10	2.45826	2.22	2.21887	2.25841	3.24673	1.91937	0
A_33_P3287383	SLC22A2	2.98287	2.53754	2.99508	2.34763	3.02057	2.32212	0
A_23_P89380	SLC4A1	3.08875	2.36621	2.91784	2.84766	2.973	2.4209	0
A_33_P3226550	SLC4A8	2.91965	2.86122	2.78588	2.5155	1.86874	2.02149	0
A_23_P21990	SLC23A1	2.50175	3.18488	3.02767	2.80274	3.18883	3.10904	0

## Sheet: plasma_count
Probe	Gene	Pos.Count	Pos.Percent
A_23_P215175	ABCF2	44	100
A_23_P11032	SLC9A7	44	100
A_33_P3384108	SLC19A1	44	100
A_23_P93217	SLC22A7	44	100
A_33_P3224819	SLC45A4	44	100
A_23_P216630	SLC44A1	44	100
A_32_P147078	SLC8A1	44	100
A_23_P152995	SLC6A4	44	100
A_33_P3316539	SLC7A2	44	100
A_33_P3298861	SLC12A8	44	100
A_33_P3240353	SLC39A4	44	100
A_33_P3337026	SLC6A8	44	100
A_23_P115726	SLC16A9	44	100
A_24_P381494	SLC11A2	44	100
A_33_P3214650	TAP2	44	100
A_24_P156049	SLC39A6	44	100
A_23_P159937	SLC6A8	44	100
A_33_P3333050	SLC9A4	44	100
A_33_P3229181	SLC12A9	44	100
A_23_P102391	SLC40A1	44	100
A_23_P252783	SLC2A8	44	100
A_32_P130630	SLC16A7	44	100
A_23_P17826	SLC5A1	44	100
A_23_P328600	SLC24A6	44	100
A_23_P129433	SLC9A5	44	100
A_23_P159125	SLC16A5	44	100
A_23_P32029	SLC35D2	44	100
A_23_P139820	SLC11A2	44	100
A_23_P259357	SLC35E4	44	100
A_33_P3298062	ABCC5	44	100
A_23_P34460	SLC35A3	44	100
A_23_P11984	SLC6A9	44	100
A_23_P361569	SLC35F5	44	100
A_23_P219013	ABCC10	44	100
A_33_P3294603	SLC22A31	44	100
A_24_P191312	SLC1A4	44	100
A_23_P217208	SLC35A2	44	100
A_24_P15621	SLC6A10P	44	100
A_23_P41380	ABCE1	44	100
A_33_P3298850	SLC16A8	44	100
A_23_P39647	SLC4A3	44	100
A_23_P388900	SLC22A15	44	100
A_24_P359191	SLC6A6	44	100
A_23_P207507	ABCC3	44	100
A_24_P342829	SLC16A14	44	100
A_23_P120794	SLC7A4	44	100
A_23_P95130	SLC37A3	44	100
A_33_P3409159	SLC22A23	44	100
A_23_P94921	SLC20A2	44	100
A_33_P3372563	ABCC10	44	100
A_24_P57528	SLC39A11	44	100
A_23_P18317	SLC41A3	44	100
A_33_P3308263	DIRC2	44	100
A_32_P126311	SLC38A9	44	100
A_23_P78018	ABCA5	44	100
A_33_P3297468	SLC34A3	44	100
A_23_P12113	FLVCR1	44	100
A_33_P3288871	SLC38A1	44	100
A_23_P151975	RHCG	44	100
A_23_P160159	SLC2A5	44	100
A_23_P165657	SLC20A1	44	100
A_33_P3702055	SLC11A1	44	100
A_23_P102508	SLC5A6	44	100
A_23_P154688	SLC4A11	44	100
A_23_P133694	SLC29A1	44	100
A_33_P3481987	SLC16A12	44	100
A_23_P201918	ABCB10	44	100
A_33_P3281465	SLC5A6	44	100
A_23_P379630	SLC38A10	44	100
A_24_P46093	SLC6A6	44	100
A_23_P208416	SLC35E1	44	100
A_33_P3251093	SLC36A1	44	100
A_23_P255057	SLC35A5	44	100
A_33_P3337044	SLC2A6	44	100
A_23_P140876	ABCA3	44	100
A_23_P5903	SLCO4A1	44	100
A_23_P84929	SLC38A5	44	100
A_33_P3277447	SLC26A2	44	100
A_23_P46871	SLC29A3	44	100
A_33_P3394710	SLC35A1	44	100
A_23_P213014	SLC2A9	44	100
A_24_P335620	SLC7A5	44	100
A_24_P58054	SLC9A8	44	100
A_23_P75811	SLC3A2	44	100
A_33_P3278187	SLC35D2	44	100
A_24_P251688	ABCF3	44	100
A_33_P3386835	SLC20A2	44	100
A_23_P22915	SLC30A7	44	100
A_23_P22625	SLC9A6	44	100
A_23_P411806	SLC44A1	44	100
A_33_P3396270	SLC9A4	44	100
A_24_P330385	SLC22A17	44	100
A_23_P19778	SLC13A4	44	100
A_24_P136866	SLC8A1	44	100
A_23_P202720	SLC35C1	44	100
A_33_P3474319	SLC37A2	44	100
A_23_P363399	SLC38A1	44	100
A_23_P75786	SLC15A3	44	100
A_24_P253251	SLC7A1	44	100
A_24_P309594	SLC48A1	44	100
A_23_P109895	SLC26A6	44	100
A_23_P35970	SLC37A4	44	100
A_33_P3353552	SLC48A1	44	100
A_24_P142503	SLC47A1	44	100
A_23_P58912	SLC35A1	44	100
A_23_P135990	SLCO2A1	44	100
A_23_P65967	SLC38A7	44	100
A_33_P3336780	ABCB8	44	100
A_24_P356916	SLC13A3	44	100
A_33_P3357530	SLC12A7	44	100
A_33_P3261737	SLC35A2	44	100
A_33_P3247082	SLC6A10P	44	100
A_24_P406986	SLC43A3	44	100
A_24_P257971	SLC27A4	44	100
A_23_P380326	SLC39A9	44	100
A_23_P213085	SLC10A7	44	100
A_23_P80778	DIRC2	44	100
A_24_P310616	SLC35A2	44	100
A_23_P571	SLC2A1	44	100
A_23_P79978	SLC24A3	44	100
A_23_P160466	SLC19A2	44	100
A_24_P382467	SLC39A3	44	100
A_23_P59005	TAP1	44	100
A_23_P30050	SLC30A9	44	100
A_33_P3368039	SLC35B2	44	100
A_23_P59950	SLC39A14	44	100
A_23_P37327	ABCD4	44	100
A_33_P3259022	SLC6A2	44	100
A_23_P218079	SLC38A2	44	100
A_24_P336276	SLCO3A1	44	100
A_23_P23575	SLC39A1	44	100
A_33_P3254380	SLC9A7P1	44	100
A_33_P3406449	SLC15A4	44	100
A_33_P3212112	SLC12A6	44	100
A_21_P0005979	SLC45A4	44	100
A_23_P43504	ABCA2	44	100
A_23_P41424	SLC39A8	44	100
A_23_P147729	SLC35E3	44	100
A_23_P140450	SLC27A2	44	100
A_24_P122732	SLC41A1	44	100
A_23_P55011	SLC38A10	44	100
A_33_P3409154	SLC22A23	44	100
A_23_P158725	SLC16A3	44	100
A_23_P339098	SLC35F2	44	100
A_23_P166297	ABCG1	44	100
A_33_P3268649	SLC2A11	44	100
A_33_P3367984	ABCA12	44	100
A_23_P139260	SLC22A18	44	100
A_33_P3422991	SLC36A4	44	100
A_33_P3245066	SLC35E2B	44	100
A_33_P3277110	SLC5A3	44	100
A_23_P137097	SLC16A2	44	100
A_23_P364324	ABCA13	44	100
A_24_P942211	SLC35E2	44	100
A_23_P159110	SLC35E3	44	100
A_24_P71373	SLC9A1	44	100
A_33_P3261743	SLC37A2	44	100
A_33_P3212102	SLC10A6	44	100
A_24_P271323	SLC2A10	44	100
A_24_P88565	SLC50A1	44	100
A_32_P46214	SLC9A9	44	100
A_33_P3273409	SLC35E1	44	100
A_24_P378788	SLC35E1	44	100
A_24_P563545	SLC30A7	44	100
A_23_P51690	RHBG	44	100
A_32_P47754	SLC2A14	44	100
A_23_P107307	SLC13A2	44	100
A_24_P227831	ABCC1	44	100
A_24_P126471	SLC12A9	44	100
A_24_P179816	SLC27A3	44	100
A_33_P3307955	ABCD3	44	100
A_23_P89455	SLC35B1	44	100
A_23_P128855	SLC39A2	44	100
A_24_P286114	SLC1A3	44	100
A_23_P328022	SLC5A10	44	100
A_23_P23815	SLC30A1	44	100
A_24_P235429	ABCA1	44	100
A_24_P113815	SLC35E2	44	100
A_23_P258221	ABCC5	44	100
A_33_P3282434	SLC16A1	44	100
A_33_P3298024	ABCC3	44	100
A_23_P217109	SLC31A2	44	100
A_23_P125078	SLC26A11	44	100
A_33_P3251108	SLC33A1	44	100
A_24_P350228	SLC22A23	44	100
A_23_P389391	SLC12A4	44	100
A_23_P422212	SLC35F3	44	100
A_24_P588897	SLCO3A1	44	100
A_23_P24345	SLC39A13	44	100
A_23_P4611	SLC27A5	44	100
A_23_P363313	SLC16A11	44	100
A_33_P3404954	SLC38A6	44	100
A_24_P382489	SLC27A1	44	100
A_23_P205489	SLC7A8	44	100
A_24_P13311	SLC15A4	44	100
A_23_P5441	ABCB6	44	100
A_24_P295963	SLC38A2	44	100
A_32_P21255	SLC30A4	44	100
A_24_P254278	SLC23A2	44	100
A_23_P145463	SLC35B3	44	100
A_23_P152791	SLC16A6	44	100
A_33_P3373273	SLC15A1	44	100
A_33_P3242458	SLC41A3	44	100
A_33_P3325262	SLC6A8	44	100
A_33_P3307957	ABCD3	44	100
A_33_P3330549	SLC44A2	44	100
A_24_P928901	SLC31A1	44	100
A_24_P174755	SLC22A5	44	100
A_33_P3402615	SLC6A9	44	100
A_32_P108474	ABCE1	44	100
A_23_P72157	MFSD7	44	100
A_33_P3311170	SLC7A5P1	44	100
A_24_P261734	SLC38A1	44	100
A_23_P130735	SLC6A16	44	100
A_33_P3222892	SLC10A3	44	100
A_23_P70571	SLC39A7	44	100
A_33_P3418158	SLC2A8	44	100
A_23_P82249	ABCB8	44	100
A_32_P25437	SLC12A2	44	100
A_33_P3358799	SLC35C2	44	100
A_23_P55998	SLC1A5	44	100
A_23_P86838	SLC36A4	44	100
A_23_P78750	SLC17A7	44	100
A_23_P251660	ABCF1	44	100
A_23_P86195	SLC44A3	44	100
A_23_P17695	SLC37A1	44	100
A_24_P10657	SLC44A2	44	100
A_23_P171258	ABCB7	44	100
A_33_P3217495	SLC5A2	44	100
A_33_P3298057	ABCC5	44	100
A_23_P253389	SLC4A2	44	100
A_24_P321068	SLC31A1	44	100
A_33_P3416321	SLC17A5	44	100
A_23_P69840	SLC35A4	44	100
A_23_P41789	SLC27A6	44	100
A_23_P218988	SLC30A5	43	97.7273
A_33_P3310301	SLC7A8	43	97.7273
A_33_P3342305	ABCA8	43	97.7273
A_33_P3211229	SLC35F2	43	97.7273
A_33_P3235611	SLC46A1	43	97.7273
A_33_P3287203	SLC22A14	43	97.7273
A_33_P3308512	SLC16A10	43	97.7273
A_23_P357929	SLC35D1	43	97.7273
A_23_P148556	ABCD1	43	97.7273
A_24_P111054	SLC2A5	43	97.7273
A_33_P3270317	SLC18A3	43	97.7273
A_33_P3367171	SLC22A8	43	97.7273
A_23_P150768	SLCO2B1	43	97.7273
A_24_P368575	SLC4A7	43	97.7273
A_33_P3323048	SLC10A7	43	97.7273
A_23_P104705	SLC29A2	43	97.7273
A_24_P208345	SLC45A3	42	95.4545
A_23_P32078	SLC28A3	42	95.4545
A_33_P3250953	SLC35B4	42	95.4545
A_23_P216468	SLC1A1	41	93.1818
A_33_P3242623	SLC7A11	41	93.1818
A_24_P365721	SLC6A14	41	93.1818
A_23_P168551	SLC29A4	40	90.9091
A_33_P3372566	ABCC10	40	90.9091
A_23_P201248	SLC26A9	40	90.9091
A_23_P92602	ABCA11P	40	90.9091
A_33_P3298043	ABCC6	39	88.6364
A_23_P99642	SLC7A7	39	88.6364
A_33_P3227691	SLC9A5	39	88.6364
A_23_P31996	SLC46A2	38	86.3636
A_23_P119778	SLC39A10	38	86.3636
A_33_P3210418	SLC5A10	38	86.3636
A_19_P00805942	SLC7A14	37	84.0909
A_33_P3235841	SLC22A20	37	84.0909
A_33_P3227920	SLC16A4	37	84.0909
A_33_P3394689	SLC6A2	37	84.0909
A_23_P77908	SLC47A2	36	81.8182
A_23_P156180	SLC22A4	36	81.8182
A_23_P118741	SLC16A13	36	81.8182
A_23_P205913	SLC24A1	36	81.8182
A_23_P28246	SLC23A3	35	79.5455
A_23_P27353	SLC14A2	35	79.5455
A_23_P165668	SLC35F5	35	79.5455
A_23_P59988	SLC35G5	34	77.2727
A_24_P296508	SLC43A2	34	77.2727
A_33_P3272744	RHBG	34	77.2727
A_33_P3303772	SLC6A3	34	77.2727
A_33_P3265549	SLC19A1	32	72.7273
A_33_P3329795	SLC22A20	32	72.7273
A_33_P3398912	SLC2A6	32	72.7273
A_33_P3265270	SLC17A5	31	70.4545
A_33_P3422897	ABCA1	31	70.4545
A_32_P23624	ABCB10	31	70.4545
A_23_P140373	FLVCR2	30	68.1818
A_24_P355626	ABCG4	30	68.1818
A_33_P3224660	ABCD1	29	65.9091
A_23_P52939	SLC43A1	29	65.9091
A_33_P3332414	ABCB1	27	61.3636
A_24_P350759	SLC1A2	27	61.3636
A_23_P80954	SLC26A1	25	56.8182
A_33_P3224190	SLC29A4	25	56.8182
A_23_P341567	SLC9B2	25	56.8182
A_33_P3274560	SLC19A3	24	54.5455
A_33_P3403399	SLC47A1	23	52.2727
A_23_P128094	ABCB9	23	52.2727
A_33_P3344801	SLC2A1	23	52.2727
A_24_P820037	SLC6A17	23	52.2727
A_33_P3400217	SLC4A1	23	52.2727
A_24_P81900	SLC2A3	22	50
A_23_P15272	ABCC6	22	50
A_23_P116642	SLC26A10	22	50
A_23_P418562	SLC6A11	22	50
A_23_P390032	SLC35G1	21	47.7273
A_33_P3262156	SLC8A1	20	45.4545
A_33_P3292621	SLC27A1	20	45.4545
A_23_P404565	SLC2A11	20	45.4545
A_23_P155487	SLC38A3	19	43.1818
A_23_P389532	SLC35G3	19	43.1818
A_33_P3330236	ABCD1	19	43.1818
A_23_P302568	SLC30A3	19	43.1818
A_33_P3269885	SLC30A10	18	40.9091
A_23_P144123	SLC22A13	17	38.6364
A_24_P178503	ABCC9	17	38.6364
A_23_P24774	ABCC8	15	34.0909
A_23_P52499	SLC18A2	14	31.8182
A_24_P29117	SLC26A1	14	31.8182
A_33_P3385006	SLC39A5	14	31.8182
A_33_P3331125	SLC2A12	14	31.8182
A_23_P77980	SLC4A1	13	29.5455
A_23_P325562	SLC1A7	13	29.5455
A_24_P247732	SLC5A6	12	27.2727
A_23_P89380	SLC4A1	12	27.2727
A_23_P215720	CFTR	11	25
A_24_P212234	SLC6A18	11	25
A_33_P3317005	SLC11A1	11	25
A_23_P503010	SLC24A4	10	22.7273
A_23_P161968	SLC22A10	10	22.7273
A_32_P309404	SLC22A3	10	22.7273
A_23_P82523	ABCB1	9	20.4545
A_23_P205074	SLC46A3	9	20.4545
A_32_P182812	SLC6A4	9	20.4545
A_33_P3361067	ABCG2	9	20.4545
A_33_P3410484	SLC13A3	9	20.4545
A_33_P3319542	SLC8A2	9	20.4545
A_24_P159312	SLC7A6	9	20.4545
A_23_P116624	SLC6A5	8	18.1818
A_23_P342641	SLC44A5	8	18.1818
A_33_P3241696	SLC45A2	8	18.1818
A_24_P156748	SLC30A2	8	18.1818
A_23_P14667	SLC28A1	8	18.1818
A_23_P30582	SLC9A3	8	18.1818
A_24_P385190	SLC4A1	8	18.1818
A_32_P358887	SLC4A4	8	18.1818
A_33_P3390637	SLC23A3	7	15.9091
A_33_P3399598	ABCD4	7	15.9091
A_23_P58729	SLC34A1	7	15.9091
A_33_P3221753	SLC22A25	7	15.9091
A_33_P3400699	SLC26A5	7	15.9091
A_24_P98047	SLC16A10	7	15.9091
A_23_P101774	SLC5A5	7	15.9091
A_33_P3336760	ABCB4	7	15.9091
A_23_P21990	SLC23A1	7	15.9091
A_33_P3361412	SLC22A15	6	13.6364
A_33_P3241393	SLC4A5	6	13.6364
A_24_P16913	ABCC4	6	13.6364
A_33_P3317797	SLC2A5	6	13.6364
A_33_P3402313	SLC9A4	6	13.6364
A_23_P92107	SLC15A2	6	13.6364
A_33_P3376947	ABCB9	6	13.6364
A_33_P3261019	SLC9A2	6	13.6364
A_33_P3268652	SLC2A11	5	11.3636
A_33_P3332052	SLC26A11	5	11.3636
A_23_P44569	ABCC2	5	11.3636
A_33_P3383331	SLC35A3	5	11.3636
A_32_P151263	SLC2A4	5	11.3636
A_23_P415611	SLC9B1	5	11.3636
A_33_P3283824	SLC39A8	5	11.3636
A_23_P259049	SLC45A2	5	11.3636
A_23_P25698	SLC10A1	4	9.09091
A_23_P37914	SLC5A11	4	9.09091
A_23_P204801	SLC41A2	4	9.09091
A_23_P42004	SLC22A16	4	9.09091
A_33_P3229156	SLC17A9	4	9.09091
A_33_P3287383	SLC22A2	4	9.09091
A_33_P3226550	SLC4A8	4	9.09091
A_24_P203765	SLC1A7	3	6.81818
A_23_P47199	SLC22A11	3	6.81818
A_24_P217234	SLC3A1	3	6.81818
A_24_P182892	SLC19A3	3	6.81818
A_23_P119763	ABCG5	3	6.81818
A_33_P3241388	SLC4A5	3	6.81818
A_33_P3283813	SLC30A8	3	6.81818
A_24_P350683	SLC9A1	3	6.81818
A_33_P3273143	SLC35E4	3	6.81818
A_23_P145569	SLC22A1	3	6.81818
A_33_P3220545	SLC6A19	3	6.81818
A_23_P30950	SLC26A8	3	6.81818
A_33_P3364089	SLCO1B3	2	4.54545
A_33_P3318148	SLC24A4	2	4.54545
A_24_P167654	SLC8A3	2	4.54545
A_23_P24149	SLC39A12	2	4.54545
A_23_P112173	SLC24A2	2	4.54545
A_24_P75680	SLC4A8	2	4.54545
A_33_P3293675	SLC12A7	2	4.54545
A_23_P56494	SLC38A11	2	4.54545
A_21_P0000067	SLC34A1	2	4.54545
A_33_P3261298	SLC6A7	2	4.54545
A_23_P55616	SLC14A1	2	4.54545
A_23_P39703	ABCB11	2	4.54545
A_33_P3316770	SLCO1A2	2	4.54545
A_23_P307570	ABCC13	2	4.54545
A_23_P66739	SLC13A5	2	4.54545
A_33_P3353365	SLC17A4	2	4.54545
A_33_P3337549	ABCB5	2	4.54545
A_23_P314811	SLC10A4	2	4.54545
A_24_P179467	SLC1A6	2	4.54545
A_33_P3210399	SLC14A1	2	4.54545
A_24_P684183	SLC44A4	2	4.54545
A_33_P3400688	SLC24A5	2	4.54545
A_23_P108075	SLC7A10	2	4.54545
A_23_P388124	ABCD2	1	2.27273
A_33_P3242693	SLC22A11	1	2.27273
A_23_P100539	ABCC6	1	2.27273
A_23_P118615	ABCA8	1	2.27273
A_23_P142250	SLC7A9	1	2.27273
A_33_P3357516	SLC10A7	1	2.27273
A_23_P256572	RHAG	1	2.27273
A_24_P355057	SLC13A1	1	2.27273
A_23_P123228	SLC26A3	1	2.27273
A_33_P3408172	SLC15A5	1	2.27273
A_33_P3417670	SLC24A1	1	2.27273
A_32_P381593	SLC26A7	1	2.27273
A_23_P140009	SLC10A2	1	2.27273
A_24_P934387	SLC5A12	1	2.27273
A_23_P116868	SLCO1C1	1	2.27273
A_33_P3367731	SLC24A2	1	2.27273
A_32_P88262	SLC7A14	1	2.27273
A_33_P3379926	SLC17A4	1	2.27273
A_21_P0010940	SLC9B1	1	2.27273
A_23_P139669	SLC2A3	1	2.27273
A_24_P926507	SLC14A1	1	2.27273
A_33_P3400700	SLC26A5	1	2.27273
A_33_P3274562	SLC19A3	1	2.27273
A_33_P3385266	ABCC6	1	2.27273
A_24_P8165	SLC15A1	1	2.27273
A_33_P3337554	ABCB5	1	2.27273
A_24_P21829	SLC22A24	1	2.27273
A_33_P3408743	SLC16A12	1	2.27273
A_23_P59051	SLC17A2	1	2.27273
A_23_P89422	ABCA10	1	2.27273
A_24_P109838	SLC6A15	1	2.27273
A_33_P3419998	SLC4A8	1	2.27273
A_33_P3281537	SLC27A3	1	2.27273
A_21_P0000624	SLC6A13	1	2.27273
A_24_P307653	SLC6A15	1	2.27273
A_33_P3403162	SLC18A1	1	2.27273
A_33_P3266390	SLC28A1	1	2.27273
A_23_P159851	SLC7A3	1	2.27273
A_33_P3355326	SLC17A2	1	2.27273
A_24_P397435	SLC6A3	1	2.27273
A_24_P314786	SLC4A10	1	2.27273
A_33_P3288624	SLC7A14	1	2.27273
A_23_P255695	SLC17A3	1	2.27273
A_23_P413888	SLC35F1	1	2.27273
A_23_P257176	SLC4A9	1	2.27273
A_33_P3251672	ABCA2	1	2.27273
A_23_P163075	SLC35F4	1	2.27273
A_23_P323943	SLC5A12	1	2.27273
A_33_P3316721	SLC22A12	1	2.27273
A_33_P3225111	SLC12A5	1	2.27273
A_23_P128254	SLCO1B1	1	2.27273
A_33_P3418421	SLC3A1	1	2.27273
A_33_P3293187	SLC14A2	1	2.27273
A_23_P135669	SLCO5A1	0	0
A_23_P397480	ABCC13	0	0
A_23_P133036	SLC34A2	0	0
A_33_P3235207	SLC38A4	0	0
A_23_P111395	SLC22A2	0	0
A_24_P242581	SLC5A9	0	0
A_24_P383356	SLC39A14	0	0
A_32_P223059	SLC45A1	0	0
A_23_P111662	ABCB5	0	0
A_33_P3361112	ABCG8	0	0
A_24_P924816	SLC2A13	0	0
A_24_P124647	SLC17A8	0	0
A_21_P0011428	SLC9B1	0	0
A_24_P13024	SLC16A12	0	0
A_23_P98616	SLC22A6	0	0
A_33_P3239052	ABCA17P	0	0
A_33_P3417081	ABCA17P	0	0
A_24_P321581	SLC38A4	0	0
A_23_P24294	SLC17A6	0	0
A_21_P0011507	SLC22A31	0	0
A_33_P3267059	SLC9A1	0	0
A_33_P3376350	SLC38A10	0	0
A_23_P368691	ABCC9	0	0
A_33_P3237210	SLC35A4	0	0
A_33_P3259293	SLC37A3	0	0
A_24_P657226	SLC9B1	0	0
A_23_P336663	SLC7A13	0	0
A_24_P405705	SLC2A2	0	0
A_32_P69802	SLCO1A2	0	0
A_23_P64980	SLC6A13	0	0
A_33_P3354514	SLC2A13	0	0
A_24_P342807	SLC30A6	0	0
A_33_P3418417	SLC3A1	0	0
A_33_P3396089	SLC38A6	0	0
A_24_P136029	SLC12A1	0	0
A_33_P3384988	SLC30A5	0	0
A_24_P20369	SLC6A20	0	0
A_33_P3418426	SLC3A1	0	0
A_24_P304311	SLC22A8	0	0
A_33_P3227696	SLC9A5	0	0
A_23_P368067	TAP2	0	0
A_24_P713267	SLCO1B7	0	0
A_23_P70102	SLC36A2	0	0
A_24_P268685	SLC6A1	0	0
A_23_P42189	SLC17A1	0	0
A_23_P73413	SLC26A7	0	0
A_33_P3381186	SLC5A8	0	0
A_33_P3780987	SLC36A3	0	0
A_33_P3368506	SLC38A8	0	0
A_33_P3299339	SLC5A7	0	0
A_23_P48816	SLC28A2	0	0
A_23_P93213	SLC22A7	0	0
A_24_P287766	ABCC12	0	0
A_32_P154342	SLCO4C1	0	0
A_33_P3415972	SLC35F1	0	0
A_23_P76386	SLC6A12	0	0
A_23_P57492	SLC5A4	0	0
A_33_P3389518	ABCC2	0	0
A_33_P3317009	SLC11A1	0	0
A_23_P331560	SLC26A4	0	0
A_33_P3236297	SLCO1A2	0	0
A_23_P355377	SLC12A5	0	0
A_33_P3780983	SLC34A3	0	0
A_23_P150590	SLC22A9	0	0
A_23_P72912	SLC4A8	0	0
A_33_P3416331	SLC10A5	0	0
A_21_P0010939	SLC9B1	0	0
A_23_P33168	SLC18A1	0	0
A_33_P3392320	SLC6A15	0	0
A_24_P930111	SLC4A10	0	0
A_23_P307382	SLC32A1	0	0
A_23_P77653	SLC12A3	0	0
A_23_P253451	SLC7A14	0	0
A_21_P0000065	SLC1A3	0	0
A_21_P0012275	SLC9B1	0	0
A_23_P300090	SLC10A7	0	0
A_33_P3282454	SLC12A1	0	0
A_33_P3238425	SLC2A7	0	0
A_23_P75820	SLC22A24	0	0
A_33_P3369799	SLC35D3	0	0
A_23_P92885	SLCO6A1	0	0
A_23_P141076	ABCC11	0	0

## Sheet: plasma_avg
Probe	Gene	Avg.Intensity
A_23_P151975	RHCG	17.296
A_33_P3481987	SLC16A12	15.5851
A_23_P259357	SLC35E4	15.4513
A_23_P216630	SLC44A1	12.413
A_33_P3402615	SLC6A9	12.2959
A_23_P59005	TAP1	12.0973
A_23_P571	SLC2A1	11.9732
A_23_P158725	SLC16A3	11.7152
A_23_P79978	SLC24A3	11.2613
A_23_P139260	SLC22A18	11.2256
A_33_P3273409	SLC35E1	11.2228
A_23_P55011	SLC38A10	11.0795
A_33_P3222892	SLC10A3	10.9972
A_23_P218079	SLC38A2	10.9736
A_33_P3240353	SLC39A4	10.8267
A_23_P251660	ABCF1	10.7073
A_23_P24345	SLC39A13	10.6335
A_23_P258221	ABCC5	10.5888
A_23_P159125	SLC16A5	10.5831
A_24_P295963	SLC38A2	10.5789
A_33_P3358799	SLC35C2	10.5466
A_23_P128855	SLC39A2	10.5426
A_24_P251688	ABCF3	10.5345
A_23_P94921	SLC20A2	10.5313
A_24_P309594	SLC48A1	10.4774
A_23_P252783	SLC2A8	10.4493
A_33_P3229181	SLC12A9	10.4422
A_23_P165657	SLC20A1	10.4162
A_33_P3330549	SLC44A2	10.3691
A_23_P18317	SLC41A3	10.3558
A_23_P202720	SLC35C1	10.3289
A_23_P17826	SLC5A1	10.2419
A_23_P75811	SLC3A2	10.2074
A_33_P3353552	SLC48A1	10.1331
A_33_P3474319	SLC37A2	10.0928
A_24_P57528	SLC39A11	9.90645
A_24_P382489	SLC27A1	9.85797
A_23_P80778	DIRC2	9.80233
A_33_P3357530	SLC12A7	9.76179
A_23_P160466	SLC19A2	9.73154
A_23_P339098	SLC35F2	9.6971
A_23_P89455	SLC35B1	9.67787
A_23_P217109	SLC31A2	9.67367
A_33_P3367984	ABCA12	9.6707
A_23_P4611	SLC27A5	9.66113
A_24_P335620	SLC7A5	9.65587
A_23_P363399	SLC38A1	9.63863
A_24_P942211	SLC35E2	9.60399
A_23_P215175	ABCF2	9.57001
A_24_P261734	SLC38A1	9.56183
A_24_P179816	SLC27A3	9.50187
A_33_P3214650	TAP2	9.50174
A_24_P10657	SLC44A2	9.48275
A_23_P125078	SLC26A11	9.47563
A_33_P3416321	SLC17A5	9.42938
A_23_P69840	SLC35A4	9.42465
A_33_P3325262	SLC6A8	9.40861
A_33_P3212112	SLC12A6	9.33816
A_33_P3298062	ABCC5	9.29784
A_23_P208416	SLC35E1	9.28928
A_23_P72157	MFSD7	9.23057
A_23_P95130	SLC37A3	9.20811
A_23_P5441	ABCB6	9.185
A_23_P154688	SLC4A11	9.12922
A_23_P135990	SLCO2A1	9.11075
A_33_P3396270	SLC9A4	9.08856
A_23_P139820	SLC11A2	8.97511
A_32_P46214	SLC9A9	8.96301
A_24_P257971	SLC27A4	8.93837
A_24_P310616	SLC35A2	8.92832
A_23_P35970	SLC37A4	8.89303
A_24_P253251	SLC7A1	8.89067
A_23_P70571	SLC39A7	8.87938
A_33_P3409154	SLC22A23	8.8775
A_23_P361569	SLC35F5	8.84418
A_23_P84929	SLC38A5	8.84191
A_24_P286114	SLC1A3	8.83775
A_23_P22625	SLC9A6	8.83283
A_23_P55998	SLC1A5	8.82392
A_24_P15621	SLC6A10P	8.82147
A_33_P3409159	SLC22A23	8.8119
A_23_P41380	ABCE1	8.80749
A_33_P3277110	SLC5A3	8.80593
A_33_P3337044	SLC2A6	8.75355
A_23_P411806	SLC44A1	8.70257
A_23_P171258	ABCB7	8.68457
A_33_P3294603	SLC22A31	8.64304
A_23_P115726	SLC16A9	8.60656
A_32_P126311	SLC38A9	8.59032
A_23_P75786	SLC15A3	8.5734
A_23_P133694	SLC29A1	8.5117
A_23_P17695	SLC37A1	8.499
A_23_P23575	SLC39A1	8.4613
A_23_P65967	SLC38A7	8.43164
A_23_P78018	ABCA5	8.42661
A_23_P102391	SLC40A1	8.36451
A_33_P3245066	SLC35E2B	8.31694
A_33_P3368039	SLC35B2	8.30607
A_23_P160159	SLC2A5	8.30143
A_33_P3251093	SLC36A1	8.25405
A_23_P218988	SLC30A5	8.22992
A_24_P336276	SLCO3A1	8.18985
A_23_P11984	SLC6A9	8.18363
A_23_P5903	SLCO4A1	8.0842
A_33_P3242458	SLC41A3	8.0778
A_23_P328600	SLC24A6	8.05072
A_24_P381494	SLC11A2	8.04651
A_33_P3373273	SLC15A1	8.03017
A_33_P3311170	SLC7A5P1	7.99256
A_33_P3406449	SLC15A4	7.97628
A_23_P59950	SLC39A14	7.92245
A_23_P19778	SLC13A4	7.91171
A_24_P227831	ABCC1	7.90169
A_24_P88565	SLC50A1	7.89886
A_23_P159937	SLC6A8	7.89571
A_23_P23815	SLC30A1	7.8603
A_33_P3337026	SLC6A8	7.85898
A_23_P147729	SLC35E3	7.85164
A_33_P3333050	SLC9A4	7.84727
A_24_P122732	SLC41A1	7.79934
A_33_P3404954	SLC38A6	7.792
A_24_P271323	SLC2A10	7.78097
A_33_P3281465	SLC5A6	7.77723
A_23_P102508	SLC5A6	7.76601
A_33_P3277447	SLC26A2	7.70872
A_23_P137097	SLC16A2	7.69331
A_24_P174755	SLC22A5	7.62552
A_33_P3307955	ABCD3	7.62497
A_23_P213014	SLC2A9	7.62346
A_33_P3308263	DIRC2	7.60459
A_23_P205489	SLC7A8	7.52496
A_24_P58054	SLC9A8	7.52424
A_23_P219013	ABCC10	7.48698
A_23_P152995	SLC6A4	7.47942
A_33_P3316539	SLC7A2	7.47596
A_24_P928901	SLC31A1	7.46725
A_23_P86195	SLC44A3	7.43304
A_23_P388900	SLC22A15	7.42604
A_24_P13311	SLC15A4	7.41879
A_32_P21255	SLC30A4	7.40673
A_24_P382467	SLC39A3	7.40153
A_23_P152791	SLC16A6	7.39248
A_23_P11032	SLC9A7	7.37657
A_23_P389391	SLC12A4	7.35678
A_23_P41789	SLC27A6	7.29018
A_23_P253389	SLC4A2	7.24384
A_23_P201918	ABCB10	7.20849
A_23_P109895	SLC26A6	7.19431
A_24_P46093	SLC6A6	7.17454
A_23_P41424	SLC39A8	7.16239
A_23_P37327	ABCD4	7.14671
A_33_P3261743	SLC37A2	7.14343
A_23_P51690	RHBG	7.11482
A_33_P3298024	ABCC3	7.03177
A_24_P350228	SLC22A23	7.01577
A_24_P588897	SLCO3A1	6.99464
A_24_P113815	SLC35E2	6.96685
A_24_P378788	SLC35E1	6.95089
A_23_P140876	ABCA3	6.91042
A_23_P86838	SLC36A4	6.87565
A_24_P235429	ABCA1	6.86513
A_33_P3418158	SLC2A8	6.86195
A_33_P3298057	ABCC5	6.83395
A_33_P3386835	SLC20A2	6.80407
A_33_P3212102	SLC10A6	6.79585
A_23_P159110	SLC35E3	6.74164
A_23_P380326	SLC39A9	6.70058
A_33_P3278187	SLC35D2	6.65401
A_23_P379630	SLC38A10	6.62682
A_24_P406986	SLC43A3	6.62304
A_23_P255057	SLC35A5	6.6228
A_24_P191312	SLC1A4	6.49606
A_33_P3394710	SLC35A1	6.48973
A_24_P321068	SLC31A1	6.4814
A_32_P47754	SLC2A14	6.46561
A_23_P207507	ABCC3	6.45395
A_23_P22915	SLC30A7	6.44823
A_33_P3224819	SLC45A4	6.42375
A_23_P30050	SLC30A9	6.41906
A_23_P93217	SLC22A7	6.41223
A_33_P3297468	SLC34A3	6.37911
A_23_P140450	SLC27A2	6.36872
A_23_P58912	SLC35A1	6.35839
A_23_P120794	SLC7A4	6.33426
A_33_P3336780	ABCB8	6.30435
A_24_P365721	SLC6A14	6.29746
A_24_P330385	SLC22A17	6.2968
A_24_P359191	SLC6A6	6.21075
A_23_P32029	SLC35D2	6.14469
A_23_P364324	ABCA13	6.12899
A_23_P363313	SLC16A11	6.12128
A_32_P25437	SLC12A2	6.11727
A_24_P156049	SLC39A6	6.09597
A_33_P3307957	ABCD3	6.01483
A_33_P3254380	SLC9A7P1	5.99957
A_24_P563545	SLC30A7	5.95519
A_23_P82249	ABCB8	5.91255
A_23_P145463	SLC35B3	5.89763
A_23_P39647	SLC4A3	5.89752
A_23_P12113	FLVCR1	5.89359
A_24_P342829	SLC16A14	5.8754
A_23_P46871	SLC29A3	5.83185
A_24_P126471	SLC12A9	5.82422
A_33_P3702055	SLC11A1	5.80577
A_33_P3298850	SLC16A8	5.79804
A_23_P78750	SLC17A7	5.79289
A_33_P3259022	SLC6A2	5.7426
A_33_P3247082	SLC6A10P	5.74026
A_23_P213085	SLC10A7	5.73393
A_32_P108474	ABCE1	5.70897
A_33_P3384108	SLC19A1	5.70003
A_23_P216468	SLC1A1	5.69109
A_24_P71373	SLC9A1	5.63352
A_33_P3288871	SLC38A1	5.62162
A_23_P166297	ABCG1	5.59211
A_23_P422212	SLC35F3	5.57854
A_33_P3372563	ABCC10	5.56635
A_23_P150768	SLCO2B1	5.55075
A_32_P130630	SLC16A7	5.55071
A_23_P34460	SLC35A3	5.54239
A_33_P3261737	SLC35A2	5.53347
A_24_P142503	SLC47A1	5.5048
A_33_P3367171	SLC22A8	5.50082
A_23_P43504	ABCA2	5.49599
A_33_P3251108	SLC33A1	5.49149
A_33_P3298861	SLC12A8	5.49031
A_23_P328022	SLC5A10	5.48389
A_33_P3268649	SLC2A11	5.46744
A_23_P130735	SLC6A16	5.44906
A_23_P201248	SLC26A9	5.44785
A_24_P136866	SLC8A1	5.42216
A_24_P254278	SLC23A2	5.38346
A_33_P3235611	SLC46A1	5.36204
A_33_P3217495	SLC5A2	5.26085
A_32_P147078	SLC8A1	5.22344
A_33_P3422991	SLC36A4	5.20231
A_23_P217208	SLC35A2	5.20036
A_23_P357929	SLC35D1	5.17681
A_33_P3310301	SLC7A8	5.16943
A_21_P0005979	SLC45A4	5.16603
A_33_P3242623	SLC7A11	5.13836
A_33_P3211229	SLC35F2	5.11919
A_24_P356916	SLC13A3	5.11432
A_24_P208345	SLC45A3	5.1024
A_23_P129433	SLC9A5	5.10165
A_33_P3250953	SLC35B4	5.08938
A_33_P3282434	SLC16A1	5.07702
A_23_P148556	ABCD1	5.06646
A_33_P3308512	SLC16A10	5.0617
A_24_P368575	SLC4A7	5.04442
A_23_P31996	SLC46A2	4.93719
A_33_P3342305	ABCA8	4.82425
A_33_P3287203	SLC22A14	4.82267
A_33_P3394689	SLC6A2	4.80803
A_33_P3323048	SLC10A7	4.80801
A_23_P104705	SLC29A2	4.74604
A_33_P3270317	SLC18A3	4.74163
A_23_P99642	SLC7A7	4.72377
A_23_P32078	SLC28A3	4.6857
A_23_P77908	SLC47A2	4.66963
A_33_P3272744	RHBG	4.61513
A_33_P3227920	SLC16A4	4.59087
A_24_P355626	ABCG4	4.57968
A_23_P107307	SLC13A2	4.50144
A_24_P111054	SLC2A5	4.48365
A_33_P3210418	SLC5A10	4.47926
A_33_P3372566	ABCC10	4.45374
A_23_P168551	SLC29A4	4.40938
A_33_P3298043	ABCC6	4.35808
A_23_P92602	ABCA11P	4.26421
A_33_P3235841	SLC22A20	4.20626
A_33_P3227691	SLC9A5	4.17267
A_23_P140373	FLVCR2	4.14195
A_23_P156180	SLC22A4	4.13225
A_23_P27353	SLC14A2	4.12256
A_23_P28246	SLC23A3	4.09522
A_23_P119778	SLC39A10	4.09415
A_19_P00805942	SLC7A14	4.08544
A_33_P3422897	ABCA1	4.06615
A_23_P165668	SLC35F5	4.04234
A_23_P118741	SLC16A13	4.0418
A_24_P296508	SLC43A2	4.02221
A_23_P52939	SLC43A1	4.01771
A_33_P3265270	SLC17A5	3.99431
A_33_P3303772	SLC6A3	3.97301
A_33_P3398912	SLC2A6	3.95184
A_32_P23624	ABCB10	3.92879
A_23_P59988	SLC35G5	3.9271
A_23_P205913	SLC24A1	3.91108
A_33_P3329795	SLC22A20	3.86462
A_33_P3332414	ABCB1	3.83984
A_33_P3265549	SLC19A1	3.81755
A_33_P3224660	ABCD1	3.74632
A_23_P116642	SLC26A10	3.70743
A_23_P341567	SLC9B2	3.67892
A_24_P350759	SLC1A2	3.67776
A_33_P3400217	SLC4A1	3.58982
A_24_P81900	SLC2A3	3.57391
A_23_P80954	SLC26A1	3.54663
A_33_P3403399	SLC47A1	3.54469
A_24_P820037	SLC6A17	3.51674
A_33_P3274560	SLC19A3	3.51074
A_33_P3292621	SLC27A1	3.48728
A_33_P3224190	SLC29A4	3.48382
A_23_P128094	ABCB9	3.46355
A_23_P15272	ABCC6	3.45856
A_23_P418562	SLC6A11	3.45565
A_33_P3344801	SLC2A1	3.44428
A_23_P390032	SLC35G1	3.44292
A_23_P302568	SLC30A3	3.42634
A_33_P3262156	SLC8A1	3.41096
A_33_P3330236	ABCD1	3.3905
A_23_P404565	SLC2A11	3.33717
A_33_P3269885	SLC30A10	3.32211
A_23_P144123	SLC22A13	3.31496
A_24_P178503	ABCC9	3.30476
A_23_P325562	SLC1A7	3.25331
A_33_P3385006	SLC39A5	3.21915
A_23_P155487	SLC38A3	3.16887
A_23_P52499	SLC18A2	3.15268
A_33_P3331125	SLC2A12	3.13263
A_23_P389532	SLC35G3	3.12942
A_23_P116624	SLC6A5	3.12594
A_24_P212234	SLC6A18	3.11848
A_33_P3361067	ABCG2	3.0826
A_23_P77980	SLC4A1	3.03898
A_23_P24774	ABCC8	3.03687
A_33_P3410484	SLC13A3	3.01548
A_24_P29117	SLC26A1	2.98964
A_23_P215720	CFTR	2.97344
A_23_P161968	SLC22A10	2.95988
A_24_P247732	SLC5A6	2.94267
A_33_P3361412	SLC22A15	2.92798
A_33_P3317005	SLC11A1	2.90583
A_33_P3390637	SLC23A3	2.90239
A_23_P205074	SLC46A3	2.89003
A_33_P3319542	SLC8A2	2.88992
A_23_P21990	SLC23A1	2.88533
A_23_P82523	ABCB1	2.88466
A_23_P503010	SLC24A4	2.87734
A_23_P30582	SLC9A3	2.87178
A_33_P3383331	SLC35A3	2.85825
A_33_P3376947	ABCB9	2.84407
A_33_P3400699	SLC26A5	2.84335
A_33_P3221753	SLC22A25	2.84219
A_24_P159312	SLC7A6	2.82239
A_33_P3241393	SLC4A5	2.79763
A_33_P3332052	SLC26A11	2.79487
A_23_P89380	SLC4A1	2.7925
A_23_P101774	SLC5A5	2.77171
A_24_P385190	SLC4A1	2.77035
A_23_P44569	ABCC2	2.76963
A_24_P156748	SLC30A2	2.75899
A_32_P309404	SLC22A3	2.75244
A_33_P3229156	SLC17A9	2.74689
A_23_P55616	SLC14A1	2.74614
A_23_P415611	SLC9B1	2.74317
A_33_P3220545	SLC6A19	2.72788
A_32_P182812	SLC6A4	2.72453
A_23_P100539	ABCC6	2.71889
A_23_P259049	SLC45A2	2.71478
A_23_P14667	SLC28A1	2.70519
A_23_P37914	SLC5A11	2.69477
A_23_P145569	SLC22A1	2.68939
A_24_P350683	SLC9A1	2.68118
A_33_P3317797	SLC2A5	2.67277
A_32_P358887	SLC4A4	2.67005
A_33_P3287383	SLC22A2	2.66245
A_33_P3225111	SLC12A5	2.65046
A_24_P98047	SLC16A10	2.6504
A_33_P3241696	SLC45A2	2.64114
A_33_P3336760	ABCB4	2.63558
A_33_P3399598	ABCD4	2.62917
A_24_P16913	ABCC4	2.61939
A_33_P3400688	SLC24A5	2.61754
A_23_P58729	SLC34A1	2.61749
A_23_P66739	SLC13A5	2.60332
A_23_P118615	ABCA8	2.60264
A_23_P342641	SLC44A5	2.58959
A_33_P3268652	SLC2A11	2.58675
A_33_P3226550	SLC4A8	2.57786
A_33_P3283824	SLC39A8	2.57718
A_33_P3241388	SLC4A5	2.56966
A_23_P119763	ABCG5	2.56655
A_33_P3261019	SLC9A2	2.55871
A_33_P3353365	SLC17A4	2.55334
A_32_P381593	SLC26A7	2.52461
A_23_P42004	SLC22A16	2.52034
A_23_P163075	SLC35F4	2.51749
A_24_P203765	SLC1A7	2.51454
A_33_P3367731	SLC24A2	2.49246
A_24_P182892	SLC19A3	2.48931
A_33_P3417670	SLC24A1	2.4733
A_33_P3402313	SLC9A4	2.47239
A_33_P3273143	SLC35E4	2.47118
A_23_P25698	SLC10A1	2.47084
A_24_P242581	SLC5A9	2.47065
A_33_P3385266	ABCC6	2.47045
A_23_P111395	SLC22A2	2.45721
A_23_P24149	SLC39A12	2.45106
A_24_P355057	SLC13A1	2.44709
A_23_P30950	SLC26A8	2.44598
A_23_P128254	SLCO1B1	2.43716
A_33_P3364089	SLCO1B3	2.43516
A_24_P179467	SLC1A6	2.42544
A_33_P3337549	ABCB5	2.42343
A_23_P92107	SLC15A2	2.41769
A_23_P39703	ABCB11	2.4055
A_23_P388124	ABCD2	2.39975
A_23_P323943	SLC5A12	2.39559
A_23_P307570	ABCC13	2.39497
A_32_P151263	SLC2A4	2.39314
A_33_P3369799	SLC35D3	2.38089
A_33_P3259293	SLC37A3	2.38022
A_23_P111662	ABCB5	2.37956
A_23_P150590	SLC22A9	2.37491
A_23_P140009	SLC10A2	2.37231
A_33_P3316770	SLCO1A2	2.3665
A_33_P3238425	SLC2A7	2.35351
A_33_P3251672	ABCA2	2.35077
A_23_P314811	SLC10A4	2.34936
A_33_P3318148	SLC24A4	2.33991
A_24_P217234	SLC3A1	2.33479
A_23_P204801	SLC41A2	2.32156
A_23_P64980	SLC6A13	2.31978
A_33_P3235207	SLC38A4	2.31578
A_33_P3417081	ABCA17P	2.3123
A_23_P108075	SLC7A10	2.31119
A_33_P3274562	SLC19A3	2.30633
A_33_P3316721	SLC22A12	2.30528
A_33_P3416331	SLC10A5	2.30171
A_33_P3266390	SLC28A1	2.30077
A_24_P167654	SLC8A3	2.29756
A_33_P3293675	SLC12A7	2.29181
A_23_P368691	ABCC9	2.2877
A_23_P413888	SLC35F1	2.28662
A_33_P3384988	SLC30A5	2.28166
A_23_P89422	ABCA10	2.28156
A_23_P256572	RHAG	2.28039
A_23_P139669	SLC2A3	2.27846
A_33_P3418421	SLC3A1	2.27683
A_33_P3299339	SLC5A7	2.27633
A_24_P109838	SLC6A15	2.27247
A_24_P268685	SLC6A1	2.26925
A_32_P88262	SLC7A14	2.26473
A_24_P684183	SLC44A4	2.26049
A_24_P930111	SLC4A10	2.26029
A_33_P3293187	SLC14A2	2.25872
A_23_P112173	SLC24A2	2.25859
A_21_P0000067	SLC34A1	2.25662
A_33_P3419998	SLC4A8	2.25603
A_33_P3210399	SLC14A1	2.25028
A_33_P3227696	SLC9A5	2.24989
A_23_P368067	TAP2	2.2474
A_23_P255695	SLC17A3	2.24459
A_33_P3415972	SLC35F1	2.24377
A_33_P3242693	SLC22A11	2.2421
A_23_P141076	ABCC11	2.24181
A_23_P133036	SLC34A2	2.23821
A_21_P0000065	SLC1A3	2.23819
A_33_P3418417	SLC3A1	2.23596
A_32_P223059	SLC45A1	2.23304
A_33_P3261298	SLC6A7	2.23229
A_23_P47199	SLC22A11	2.23136
A_33_P3283813	SLC30A8	2.22658
A_24_P314786	SLC4A10	2.22497
A_33_P3355326	SLC17A2	2.22411
A_24_P75680	SLC4A8	2.2195
A_23_P159851	SLC7A3	2.21622
A_23_P76386	SLC6A12	2.21002
A_33_P3379926	SLC17A4	2.20847
A_21_P0011428	SLC9B1	2.20724
A_24_P8165	SLC15A1	2.20555
A_33_P3282454	SLC12A1	2.2039
A_23_P75820	SLC22A24	2.20349
A_33_P3357516	SLC10A7	2.2019
A_23_P123228	SLC26A3	2.19834
A_33_P3337554	ABCB5	2.19667
A_33_P3392320	SLC6A15	2.19119
A_23_P24294	SLC17A6	2.1909
A_33_P3396089	SLC38A6	2.18696
A_23_P92885	SLCO6A1	2.18663
A_21_P0000624	SLC6A13	2.18283
A_33_P3389518	ABCC2	2.1824
A_33_P3361112	ABCG8	2.18196
A_23_P59051	SLC17A2	2.18194
A_23_P397480	ABCC13	2.17911
A_24_P397435	SLC6A3	2.17873
A_23_P336663	SLC7A13	2.17811
A_23_P355377	SLC12A5	2.17796
A_24_P934387	SLC5A12	2.17596
A_23_P116868	SLCO1C1	2.17455
A_23_P56494	SLC38A11	2.17425
A_23_P257176	SLC4A9	2.17227
A_24_P136029	SLC12A1	2.16067
A_23_P253451	SLC7A14	2.15587
A_24_P124647	SLC17A8	2.15134
A_23_P98616	SLC22A6	2.14966
A_33_P3354514	SLC2A13	2.14715
A_23_P93213	SLC22A7	2.14414
A_23_P57492	SLC5A4	2.14046
A_23_P77653	SLC12A3	2.13557
A_32_P154342	SLCO4C1	2.1319
A_33_P3408172	SLC15A5	2.13021
A_23_P142250	SLC7A9	2.12864
A_33_P3780983	SLC34A3	2.12773
A_32_P69802	SLCO1A2	2.12682
A_33_P3236297	SLCO1A2	2.12312
A_33_P3408743	SLC16A12	2.1222
A_23_P135669	SLCO5A1	2.12027
A_23_P307382	SLC32A1	2.11864
A_33_P3317009	SLC11A1	2.11741
A_21_P0011507	SLC22A31	2.11579
A_24_P383356	SLC39A14	2.10945
A_24_P926507	SLC14A1	2.10381
A_23_P73413	SLC26A7	2.09111
A_23_P300090	SLC10A7	2.09019
A_24_P307653	SLC6A15	2.08144
A_33_P3400700	SLC26A5	2.07886
A_24_P287766	ABCC12	2.07732
A_33_P3376350	SLC38A10	2.07409
A_24_P321581	SLC38A4	2.0715
A_33_P3281537	SLC27A3	2.06824
A_21_P0012275	SLC9B1	2.06724
A_33_P3288624	SLC7A14	2.06563
A_24_P657226	SLC9B1	2.06225
A_24_P304311	SLC22A8	2.05949
A_21_P0010939	SLC9B1	2.05729
A_23_P70102	SLC36A2	2.05362
A_21_P0010940	SLC9B1	2.04369
A_33_P3418426	SLC3A1	2.04137
A_24_P20369	SLC6A20	2.04119
A_23_P72912	SLC4A8	2.03541
A_23_P33168	SLC18A1	2.03142
A_24_P21829	SLC22A24	2.03061
A_24_P713267	SLCO1B7	2.03012
A_33_P3237210	SLC35A4	2.02743
A_33_P3403162	SLC18A1	2.02457
A_23_P331560	SLC26A4	2.01442
A_24_P342807	SLC30A6	2.01438
A_33_P3780987	SLC36A3	2.01201
A_24_P13024	SLC16A12	2.00924
A_33_P3381186	SLC5A8	2.00825
A_33_P3368506	SLC38A8	2.00601
A_24_P924816	SLC2A13	1.99517
A_33_P3267059	SLC9A1	1.98998
A_23_P42189	SLC17A1	1.98233
A_33_P3239052	ABCA17P	1.98176
A_24_P405705	SLC2A2	1.9763
A_23_P48816	SLC28A2	1.97064
